1 **A spatially regulated GTPase cycle of Rheb controls growth factor signaling to**  
2 **mTORC1**

3

4 Marija Kovacevic<sup>1,#</sup>, Christian H. Klein<sup>1,2,#</sup>, Lisaweta Roßmannek<sup>1</sup>, Antonios D.

5 Konitsiotis<sup>1</sup>, Angel Stanoev<sup>1</sup>, Astrid U. Kraemer<sup>1</sup>, Philippe I. H. Bastiaens<sup>1, 2\*</sup>

6

7 **Affiliations**

8 <sup>1</sup>Department of Systemic Cell Biology, Max Planck Institute of Molecular  
9 Physiology, Otto-Hahn-Str. 11, 44227 Dortmund, Germany.

10 <sup>2</sup>Fakultät Chemie und Chemische Biologie, Technische Universität Dortmund,  
11 Otto-Hahn-Str. 6, 44221 Dortmund, Germany

12 # contributed equally

13 **Contact Information**

14 \*Correspondence to: [philippe.bastiaens@mpi-dortmund.mpg.de](mailto:philippe.bastiaens@mpi-dortmund.mpg.de)

15

16

17

18

19 **ABSTRACT**

20 Growth factors initiate anabolism by activating mechanistic target of rapamycin complex 1  
21 (mTORC1) via the small GTPase Rheb. We show that the GTPase cycle of Rheb is spatially  
22 regulated by the interaction with its GDI-like solubilizing factor (GSF) – PDE $\delta$ . Arl2-GTP  
23 mediated localized release of cytosolic Rheb-GTP from PDE $\delta$  deposits it onto perinuclear  
24 membranes where it forms a complex with mTORC1. The membrane associated GTPase  
25 activating protein (GAP) TSC2 hydrolyzes Rheb-GTP, weakening the interaction with mTOR.  
26 Rheb-GDP is readily released into the cytosol where it is maintained soluble by interaction  
27 with PDE $\delta$ . This solubilized Rheb is re-activated by nucleotide exchange to be re-deposited  
28 by Arl2-mediated release onto perinuclear membranes. This spatial GTPase cycle thereby  
29 enables mTORC1 activation to be solely controlled by growth factor induced inactivation of  
30 TSC2. The coupling between mTOR activation and spatially regulated Rheb nucleotide  
31 exchange makes growth factor induced proliferation critically dependent on PDE $\delta$   
32 expression.

33

34

## 35 INTRODUCTION

36 mTORC1 is a central signaling node that interlinks growth factor signals and the processes  
37 that drive cellular growth. This is achieved by altering cellular metabolism to drive anabolic  
38 processes necessary for cell growth, including biosynthesis of proteins, lipids and nucleic  
39 acids, and by inhibiting catabolic processes, such as autophagy (1-4). mTORC1 recruitment  
40 and activation occurs via intracellular sensing of amino acids at the lysosomal membrane,  
41 which in turn activates the Ras-related GTPase (Rag) heterodimers (5-7). On the other hand,  
42 extracellular growth factor stimulation of receptor tyrosine kinases (RTKs) transmit signals  
43 through the phosphoinositide-3-kinase/RAC-serine/threonine-protein kinase (PI3K/Akt) axis,  
44 resulting in the activation of mTORC1 via binding of the GTP-bound form of the small GTPase  
45 Ras homologue enriched in brain (Rheb) (1). This process critically involves the inhibition of  
46 the Rheb GAP tuberous sclerosis complex (TSC), formed of hamartin (TSC1), tuberin (TSC2),  
47 and a Tre2-Bub2-Cdc16 1 domain family, member 7 (TBC1D7) (8, 9). The TSC2 subunit  
48 contains the GAP domain, maintaining Rheb in the inactive GDP-bound form in the absence  
49 of growth signal stimuli. TSC2 associates with lysosomes but quickly relocalizes to the  
50 cytoplasm upon amino acid or growth factor stimulation (10, 11). This enables Rheb-GTP to  
51 bind mTOR and activate mTORC1, which propagates signals to downstream effectors such as  
52 ribosomal protein S6 (S6P) and eukaryotic translation initiation factor 4E-binding protein 1  
53 (4EBP1) that promote protein synthesis and cell growth (12, 13). Although overall Rheb-GTP  
54 levels are high in cells (14, 15), a guanine nucleotide exchange factor (GEF) for Rheb remains  
55 elusive.

56 Rheb is a member of the large family of Ras GTPases and contains a highly conserved G-  
57 domain, which is critical to its function in signal transduction (16). Rheb, like all Ras proteins,

58 is post-translationally modified by the addition of a farnesyl moiety via a stable thioether  
59 linkage to the Cys residue of its C-terminal CAAX motif (17-19). Additional targeting features  
60 such as reversible palmitoylation for N- and H-Ras and a polybasic stretch for K-Ras,  
61 upstream of the CAAX motif in the hypervariable region (HVR) maintain these Ras family  
62 proteins at the plasma membrane (PM) (17, 20-23). Due to the lack of these secondary  
63 targeting features, farnesylated Rheb associates with any membrane in the cell, causing its  
64 partitioning to the vast endomembrane surfaces of the cell (24, 25). However, in addition to  
65 this unspecific partitioning to cellular membranes, a significant enrichment on perinuclear  
66 membranes on and proximal to the late endosome/lysosome has been observed (7, 11, 26-  
67 28).

68 It was shown that Rheb interacts with the GSF PDE $\delta$  (delta subunit of phosphodiesterase-6)  
69 via its C-terminal farnesyl (24, 29, 30). Furthermore, PDE $\delta$  plays an essential role in spatial  
70 cycles that maintain prenylated Ras proteins on the PM by sequestering them in the cytosol  
71 (22, 24, 30). A small GTPase ADP-ribosylation factor like 2 (Arl2) mediates the release of  
72 farnesylated Ras from PDE $\delta$  on perinuclear membranes in a GTP dependent manner (22, 30).  
73 This concentrates Ras on perinuclear membranes, where electrostatic interaction traps K-  
74 Ras on the recycling endosome, and palmitoyl addition via palmitoyltransferase (PAT) traps  
75 the H- and N-Ras on the Golgi apparatus. Association with the anterograde vesicular  
76 transport from these organelles then reinstates PM localization of Ras proteins (31). Rheb  
77 lacks the secondary targeting features that enable anterograde transport to the PM.  
78 Therefore, we hypothesized that Arl2-mediated release from PDE $\delta$  concentrates Rheb on  
79 perinuclear lysosomal/late endosomal membranes where its effector mTOR resides. Herein,  
80 we do not only show that Rheb localization is indeed maintained by an energy-driven PDE $\delta$ -

81 Arl2 mediated spatial cycle, but that this cycle also drives its GTPase cycle, which is essential  
82 to maintain mTORC1 responsiveness to growth factors.

83

## 84 **RESULTS**

### 85 **Growth factor stimulation affects the partitioning of Rheb between perinuclear** 86 **membranes and the cytosol**

87 To determine the subcellular localization of Rheb, we compared the distribution of  
88 ectopically expressed Rheb, N-terminally tagged with mCitrine (mCitrine-Rheb) with the  
89 endogenous localization of Rheb, as determined by immunofluorescence (IF) using a Rheb  
90 specific antibody in mouse embryonic fibroblasts (MEFs) immortalized through a p53  
91 knockout (TSC2+/+ MEFs from here on). Both proteins were found on endomembranes, with  
92 a significant enrichment on perinuclear membranes that coincided with the localization of  
93 the Rheb effector mTOR (**Fig. 1a**), as well as with the late endosome/lysosome marker, Rab 7  
94 (**Fig. 1b**). However, a significant fraction of Rheb could also be observed in the cytosol.

95 To examine whether the partitioning of Rheb between cytosol and membranes is affected by  
96 the activation of mTOR upon growth factor stimulation, we treated serum-starved TSC2+/+  
97 MEFs with insulin and monitored the localization of mCitrine-Rheb over time by radial  
98 segmentation of the cells into 3 spatial bins from plasma membrane (PM) to nuclear  
99 membrane (NM) within a 60° angle around the mCitrine-Rheb intensity-weighted  
100 longitudinal cellular axis. Upon insulin stimulation, mCitrine-Rheb was transiently recruited  
101 to perinuclear membranes of the cell, suggesting the local interaction of active Rheb-GTP  
102 with the effector mTOR (**Fig. 1c**). Consistent with this, IF for endogenous Rheb and mTOR at

103 different time points after insulin stimulation of serum-starved TSC2<sup>+/+</sup> MEFs also displayed  
104 a transient recruitment of endogenous Rheb to mTOR containing membranes (**Fig. 1d**).  
105 Enrichment of endogenous Rheb on mTOR-rich membranes was slightly delayed compared  
106 to ectopically expressed mCitrine-Rheb, (30 min in the IF versus 12 min in the live-cell time  
107 course), reflecting a shift in the reaction rate upon increasing the concentration of a reactant  
108 according to the law of mass action. This transient increase in Rheb-enrichment on mTOR  
109 containing membrane indicates that the interchange between the soluble and membrane-  
110 bound fraction of Rheb is dynamic, likely mediated and maintained by the solubilizing factor  
111 PDE $\delta$ .

#### 112 **Arl2-mediated localized release from PDE $\delta$ deposits Rheb on perinuclear membranes**

113 We examined how the interaction of Rheb with PDE $\delta$  influences its cytosol-membrane  
114 partitioning by inhibiting PDE $\delta$  function using the small-molecule inhibitor Deltarasin that  
115 targets PDE $\delta$ 's prenyl-binding pocket (29). For this, we monitored the localization of Rheb,  
116 N-terminally tagged with mCherry (mCherry-Rheb) as well as the hypervariable region of  
117 Rheb, N-terminally tagged with mCitrine (mCitrine-Rheb HVR) in TSC2<sup>+/+</sup> MEFs after  
118 treatment with 3  $\mu$ M Deltarasin. This resulted in a gradual loss of the perinuclear enrichment  
119 for both proteins, demonstrating that the interaction of PDE $\delta$  via the farnesyl group in the  
120 HVR is necessary for generating the perinuclear concentration of Rheb (**Fig. 2a**). We also  
121 directly monitored the effect of Deltarasin on the interaction between Rheb and PDE $\delta$  by  
122 fluorescence lifetime imaging microscopy of Förster resonance energy transfer (FLIM-FRET),  
123 with mCitrine-Rheb as the donor and PDE $\delta$ , C-terminally tagged with mCherry (mCherry-  
124 PDE $\delta$ ) as FRET acceptor (29, 32, 33) (**Fig. 2b**). The interaction between mCitrine-Rheb and  
125 mCherry-PDE $\delta$  was apparent from the decrease in donor fluorescence lifetime of mCitrine-

126 Rheb upon co-expression of mCherry-PDE $\delta$  (**Fig. 2c**). In order to quantify how mCherry-PDE $\delta$   
127 expression affects this interaction, we computed the fraction ( $\alpha$ ) of mCitrine-Rheb  
128 interacting with mCherry-PDE $\delta$  from the fluorescence decay profiles by global analysis (34)  
129 (**Fig. 2b,d**).  $\alpha$  increased with the expression level of mCherry-PDE $\delta$ , reflecting that the  
130 amount of detected mCitrine-Rheb/mCherry-PDE $\delta$  complexes is limited by the availability of  
131 the solubilizer, mCherry-PDE $\delta$  (**Fig. 2d**). Treatment with Deltarasin clearly diminished the  
132 interaction that occurs throughout the cytoplasm and led to an increased overall membrane  
133 deposition of mCitrine-Rheb as indicated by the loss of nuclear mCitrine-Rheb fluorescence  
134 (**Fig. 2e**). These experiments indicate that while the interaction of Rheb with PDE $\delta$  causes a  
135 fraction of Rheb to be partitioned to the cytosol, it also drives the perinuclear enrichment of  
136 Rheb, countering equilibration to other endomembranes. We therefore hypothesized that  
137 activity of Arl2 at perinuclear membranes causes local deposition of Rheb by releasing it  
138 from PDE $\delta$ .

139 The small GTPases Arl2 and Arl3 bind PDE $\delta$  in a GTP-dependent manner, thereby inducing an  
140 allosteric release of farnesylated cargo from PDE $\delta$  (30, 35). Only Arl2 was shown to be  
141 essential for the maintenance of the PM enrichment of K-Ras (22) and an Arl2 GEF has so far  
142 not been identified. The subcellular locus of allosteric Arl2 release activity on PDE $\delta$  has  
143 however been demonstrated to occur in a region on or proximal to the recycling endosome  
144 (22). IF using an Arl2 specific antibody in TSC2 $^{+/+}$  MEFs showed that Arl2 proteins reside on  
145 perinuclear membranes, as well as in the nucleus and to a lesser extent in the cytoplasm  
146 (Supplementary **Fig. 1a**). This indicates that Arl2 proteins partition between the cytosol and  
147 membranes, consistent with biophysical data that shows that Arl proteins interact with  
148 membranes via their N-terminal amphipathic helices (36). In comparison, IF with a PDE $\delta$

149 specific antibody only showed nuclear and diffuse cytoplasmic staining, consistent with the  
150 soluble state of the protein.

151 To investigate if and where Arl2-mediated release takes place, we measured the interaction  
152 between endogenous PDE $\delta$  and Arl2 by in situ proximity ligation assay (PLA) (37). The PLA  
153 reaction generates discrete fluorescent puncta in areas of the cell where protein interactions  
154 occur (38). To obtain information on the radial distribution of this interaction, we computed  
155 the distance for each PLA punctum to the center of the nucleus in many cells (see 'Methods',  
156 **Fig. 2f, Supplementary Fig. 1b**). The puncta distributions for Arl2/PDE $\delta$  peaked at the  
157 position of the nuclear membrane and the adjacent nuclear spatial bin, to rapidly decay  
158 towards the cell periphery. However, the shape of these puncta distributions is biased by the  
159 cell shape and size (**Fig. 2f, 'Methods'**). To correct for this bias in the puncta distributions, a  
160 pixel-distance distribution to the center of the nucleus that reflects the cell shapes was  
161 subtracted (**Supplementary Fig. 1b**). The positive peak around the average position of the  
162 nuclear membrane and the negative broad peak in the cytoplasmic area in these distance  
163 distributions, show that the interaction between PDE $\delta$  and Arl2 predominantly occurs near  
164 perinuclear membranes of the cell, which implies that allosteric release of Rheb from PDE $\delta$   
165 occurs in this area. Additionally, the 3D distribution of each PLA punctum to the nuclear  
166 center showed that the majority of the puncta in the spatial bins proximal to the nuclear  
167 membrane were located outside of the nucleus. This confirmed the results obtained from  
168 the 2D projections that the allosteric release of Rheb from PDE $\delta$  via Arl2 activity occurs in  
169 the perinuclear area of the cell.

170 The transient increase in Rheb localization in the perinuclear area upon insulin stimulation  
171 (**Fig. 1c,d**) suggests that growth factor stimulation can either cause increased deposition on



172 or increased retention of Rheb at perinuclear membranes. The Rheb-GAP TSC2 dissociates  
173 from lysosomes to the cytoplasm upon growth factor stimulation (11), thereby likely causing  
174 an increase in Rheb-GTP on lysosomal membranes that can bind and activate mTOR. To  
175 evaluate whether TSC2, and thereby the activation state of Rheb, can influence its steady  
176 state localization, we compared the perinuclear enrichment of mCitrine-Rheb in TSC2+/+  
177 MEFs to that in TSC2-/- MEFs, an isogenic cell line in which TSC2 is knocked out, resulting in  
178 constitutively active Rheb-GTP (39, 40). The perinuclear membrane enrichment of mCitrine-  
179 Rheb was significantly increased in the TSC2-/- MEFs as compared to the TSC2+/+ MEFs  
180 (**Supplementary Fig. 2**) indicating that the phosphorylation state of the guanine nucleotide  
181 bound to Rheb increases its retention on perinuclear membranes.

182 To investigate how the PDE $\delta$  mediated partitioning of Rheb is coupled to its GTPase cycle,  
183 we generated PDE $\delta$  knockouts of TSC2+/+ and TSC2-/- MEFs by CRISPR-Cas9 (41, 42) using a  
184 single guide RNA targeting PDE $\delta$  (TSC2+/+ sgRNA PDE $\delta$ ) and an empty Cas9 vector (TSC2+/+  
185 E.V.) as control. Evaluation of perinuclear enrichment of mCitrine-Rheb in these cells by  
186 segment analysis (**Fig. 3a,b**) revealed a significant decrease for the TSC2+/+ sgRNA PDE $\delta$   
187 cells, as well as a concurrent increase in fluorescence intensity in the periphery of the cell  
188 (**Fig. 3a**). This is consistent with the experiments shown in **Fig. 2a,b** that demonstrate that  
189 Rheb solubilization by PDE $\delta$  is necessary to maintain a concentration of Rheb on perinuclear  
190 membrane compartments. In contrast, the radial intensity profile of mCitrine-Rheb in TSC2-/  
191 -/- MEFs was unaffected by PDE $\delta$  knockout (**Fig. 3b**). This indicates that in absence of TSC2  
192 perinuclear Rheb enrichment is determined by its interaction with mTOR, uncoupling its  
193 enrichment from PDE $\delta$ -mediated deposition.

194 If Arl2 acts as the factor releasing Rheb from PDE $\delta$  in the perinuclear area to maintain Rheb  
195 enrichment there, siRNA-mediated knockdown of Arl2 should disrupt perinuclear  
196 enrichment of Rheb and increase the fraction of PDE $\delta$ -bound, soluble Rheb. Indeed, in  
197 TSC2+/+ cells, Arl2 knockdown resulted in a significant decrease in perinuclear enrichment of  
198 mCitrine-Rheb and an increased soluble fraction of mCitrine-Rheb, as apparent from its  
199 increased nuclear intensity (**Fig. 3c, graphs**). This shows that Arl2 activity unloads Rheb from  
200 PDE $\delta$  onto perinuclear membranes. In contrast, Arl2 knockdown had no effect on mCitrine-  
201 Rheb solubilization or perinuclear enrichment in TSC2-/- MEFs (**Fig. 3d, graphs**), providing  
202 further evidence that in absence of TSC2, Rheb-GTP is stably associated with perinuclear  
203 membranes due to interaction with its effector mTOR. Arl3 knockdown had no effect on  
204 mCitrine-Rheb localization, neither in TSC2+/+ nor TSC2-/- MEFs (**Fig. 3c,d**), showing that  
205 Arl3 does not allosterically release Rheb from PDE $\delta$ . These results show that perinuclear  
206 membrane localized Arl2-GTP activity mediates release of Rheb from PDE $\delta$  onto perinuclear  
207 membranes. This release mechanism thereby generates a directional flux in Rheb cycling  
208 between membranes and cytosol, where GTP hydrolysis happens on TSC2-containing  
209 perinuclear membranes.

210 To further substantiate this, we investigated the radial distribution of mCitrine-Rheb-HVR,  
211 which interacts with PDE $\delta$  via the farnesyl tail but cannot interact with mTOR due to the lack  
212 of the Rheb G-domain. In both TSC2+/+ and TSC2-/- sgRNA PDE $\delta$  MEFs, the distribution of  
213 mCitrine-Rheb HVR decreased significantly towards the perinuclear segment of the cells as  
214 compared to their E.V. controls (**Fig. 4a**) showing that RhebGTP retention on perinuclear  
215 membranes occurs via mTOR interaction. In full agreement with this notion, the radial  
216 profiles of the active EYFP-Rheb Q64L mutant, which was shown to display a higher GTP  
217 loading status than wild type Rheb (14, 43), were independent of PDE $\delta$  in both examined cell

218 types (**Fig. 4b**). These experiments indicate that interference with the hydrolysis of GTP-  
219 loaded Rheb either by knock-out of TSC2 or by a constitutively active mutant enables a  
220 sufficiently strong level of Rheb-effector interaction to retain Rheb on perinuclear  
221 membranes without requiring continuous re-deposition by PDE $\delta$ . To substantiate that Rheb-  
222 GTP interacting with effectors on membranes is poorly re-solubilized by PDE $\delta$ , we quantified  
223 the perinuclear enrichment of mCitrine-Rheb upon ectopic mCherry-PDE $\delta$  expression in  
224 TSC2+/+ and TSC2-/- cells (**Fig. 4c**). In TSC2+/+ MEFs perinuclear enrichment of mCitrine-  
225 Rheb was decreased upon ectopic mCherry-PDE $\delta$  expression. In contrast, mCitrine-Rheb  
226 perinuclear enrichment was unaffected by ectopic PDE $\delta$  expression in TSC2-/- cells. These  
227 results indicate that perinuclear membrane associated Rheb-GTP cannot be (re)-solubilized  
228 by PDE $\delta$  due to its interaction with effectors on membranes.

#### 229 **mTORC1 signaling depends on PDE $\delta$ and Arl2.**

230 To investigate the functional implications of PDE $\delta$ -mediated solubilization of Rheb on its  
231 growth factor-controlled GTPase cycle, we compared the effect of PDE $\delta$  knockout on  
232 mTORC1 signaling in TSC2+/+ and TSC2-/- cells. The signaling output of mTORC1 was  
233 determined by the level of ribosomal protein S6 (S6P) phosphorylation in response to 300  
234 nM insulin for 15 minutes. PDE $\delta$  knockout significantly reduced both, basal and insulin-  
235 induced S6P phosphorylation in TSC2+/+ MEFs (**Fig. 5a, Supplementary Fig. 3**). In contrast,  
236 PDE $\delta$  knockout in TSC2-/- MEFs showed no effect on basal S6P phosphorylation that was  
237 independent on insulin stimulation (**Fig. 5b, Supplementary Fig. 4**). In agreement with these  
238 results, siRNA-mediated knockdown of Arl2 and not Arl3 led to a decrease in S6P  
239 phosphorylation only in TSC2+/+ MEFs, while in TSC2-/- MEFs phosphorylation of S6  
240 remained unchanged (**Fig. 5c,d, Supplementary Fig. 5**).

241 To investigate whether increased GTP loading of Rheb could rescue the mTOR signaling  
242 deficit induced by PDE $\delta$  knockout, we ectopically expressed the EYFP-Rheb Q64L mutant.  
243 Indeed, in TSC2 $^{+/+}$  sgRNA PDE $\delta$ , RhebQ64L expression raised S6P phosphorylation back to a  
244 level comparable to TSC2 $^{+/+}$  E.V. cells, while a slight increase in S6P phosphorylation was  
245 observable in TSC2 $^{+/+}$  E.V.. In contrast, RhebQ64L expression did not significantly alter the  
246 higher basal S6P phosphorylation levels in TSC2 $^{-/-}$  MEF cells with or without PDE $\delta$  knockout  
247 **(Fig. 5e, Supplementary Fig. 6).**

248 To confirm that the loss of S6P phosphorylation is indeed a consequence of the PDE $\delta$   
249 knockout, we transiently expressed a mCherry-PDE $\delta$  construct in TSC2 $^{+/+}$  MEF cells with and  
250 without PDE $\delta$  knockout and studied basal and insulin stimulated S6P phosphorylation. As  
251 expected, PDE $\delta$  re-expression led to an increase of pS6P in the TSC2 $^{+/+}$  sgRNA PDE $\delta$  MEFs  
252 while in the TSC2 $^{+/+}$  E.V. ectopic PDE $\delta$  expression had no significant effect on the pS6P level  
253 **(Fig. 5f, Supplementary Fig. 7).** Complementary to this, increasing mCherry-PDE $\delta$  expression  
254 in parental TSC2 $^{+/+}$  MEFs decreased S6P phosphorylation, while mCherry-PDE $\delta$  expression  
255 had no effect on S6P phosphorylation in the TSC2 $^{-/-}$  MEFs **(Fig. 5g, Supplementary Fig. 8).**  
256 This indicates that there is an optimal PDE $\delta$  concentration that enables S6P signaling: Both, a  
257 too low and a too high level of PDE $\delta$  render Rheb-GTP enrichment on perinuclear  
258 membranes insufficient to allow robust S6P signaling. In the former case, too few PDE $\delta$   
259 molecules are available to solubilize Rheb molecules from endomembranes and the low  
260 concentration of PDE $\delta$  loaded with Rheb becomes rate limiting in the Arl mediated release in  
261 the perinuclear area. In the latter case (high PDE $\delta$  concentration), the fraction of PDE $\delta$   
262 loaded with Rheb becomes so low with respect to total PDE $\delta$  that the Arl-mediated release  
263 operates mostly on PDE $\delta$  without cargo, thereby generating a futile cycle.

264 These experiments demonstrate that PDE $\delta$ -mediated solubilization of Rheb is essential for  
265 activating mTORC1 signaling in response to growth factor signals. The retention of Rheb-GTP  
266 at perinuclear membranes by interaction with its effector mTOR implies that the Rheb  
267 species dissociating from perinuclear membranes before solubilization by PDE $\delta$  must  
268 primarily be Rheb-GDP and indicates that nucleotide exchange happens on soluble, PDE $\delta$ -  
269 bound Rheb. Since Rheb was speculated to function independent of a GEF and was shown to  
270 exhibit a significantly higher intrinsic nucleotide exchange rate in solution versus membrane  
271 (44), we hypothesized that the dynamics of the PDE $\delta$ /Arl2 system could generate a constant  
272 re-flux of Rheb-GTP to perinuclear membranes, where the growth-factor regulated level of  
273 TSC2 activity determines the level of S6P phosphorylation. To investigate this, we labeled  
274 cells using radioactive ortho-phosphate, immuno-precipitated Rheb from the lysates and  
275 separated GTP and GDP fractions by thin layer chromatography. TSC2<sup>+/+</sup> sgRNA PDE $\delta$   
276 exhibited a significantly higher GTP/GDP ratio compared to TSC2<sup>+/+</sup> E.V., while there was no  
277 difference between TSC2<sup>-/-</sup> E.V. and TSC2<sup>-/-</sup> sgRNA PDE $\delta$  GTP/GDP ratios. Moreover, the  
278 TSC2<sup>+/+</sup> sgRNA PDE $\delta$  GTP/GDP ratio resembled that of TSC2 knock out cell lines. The  
279 increased Rheb GTP level upon PDE $\delta$  knockout (**Fig. 5h, Supplementary Fig. 9**) in conjunction  
280 with the loss of perinuclear Rheb to other endomembranes (**Fig. 3a**) and the dramatic  
281 reduction in S6P phosphorylation under the same condition (**Fig. 5a**), implies that the PDE $\delta$ -  
282 Arl2 localization system is indeed essential to promote the reflux of Rheb that has  
283 undergone nucleotide exchange in the cytoplasm to perinuclear membranes, where it is  
284 inactivated by TSC2 in absence of growth factor signals.

285 **Cell growth depends on the PDE $\delta$ -mediated spatial cycle of Rheb**

286 The dependence of growth factor induced mTORC1 activity on PDE $\delta$  suggested that  
287 disruption of PDE $\delta$ -mediated solubilization of Rheb will have an inhibitory effect on cell  
288 growth only in TSC2 $^{+/+}$  cells that are responsive to growth factors. We therefore monitored  
289 the effect of PDE $\delta$  knockout on cell growth by real time cell analyzer (RTCA) and colony  
290 formation by clonogenic assays in TSC2 $^{+/+}$  as well as TSC2 $^{-/-}$  MEFs.

291 PDE $\delta$  knockout resulted in a dramatic decrease of cell growth in TSC2 $^{+/+}$  MEFs, as compared  
292 to both E.V. and parental control cells, as apparent from RTCA growth curves as well as  
293 clonogenic assays (**Fig. 6a,c**). This is consistent with PDE $\delta$ -mediated solubilization of Rheb  
294 being necessary for mTORC1 responsiveness to growth factors. In contrast, no reduction in  
295 growth was observed in TSC2 $^{-/-}$  PDE $\delta$  sgRNA MEFs, consistent with Rheb-GTP being  
296 uncoupled from the PDE $\delta$ -mediated solubilization cycle in these cells (**Fig. 6b,d**). Instead, a  
297 slightly increased growth rate was observed, likely reflecting that most Rheb-GTP is  
298 partitioned to membranes and therefore drives mTOR activation on lysosomes.

## 299 **DISCUSSION**

300 Here, we show that growth factor induced Rheb activity on mTORC1 is critically dependent  
301 on the solubilizing activity of PDE $\delta$ . This GSF causes the partitioning of Rheb between  
302 membranes and the cytosol. Arl2-GTP mediated localized release of Rheb-GTP from PDE $\delta$   
303 onto perinuclear membranes, combined with TSC2 mediated hydrolysis to Rheb-GDP that is  
304 resolubilized by PDE $\delta$ , generates a flux in what constitutes a spatial Rheb cycle. This spatial  
305 cycle not only counters equilibration of Rheb to all membranes, but also enables Rheb to  
306 cycle through inactivating GAP activity on TSC2-containing membranes and guanine  
307 nucleotide exchange in the cytosol. Growth factor signals that inhibit TSC2 stall the spatial  
308 cycle by, on the one hand, accumulating cytosolic Rheb-GTP on perinuclear membranes by

309 Arl2-mediated release from PDE $\delta$ , and on the other hand, by not releasing Rheb-GTP into  
310 the cytosol due to its interaction with mTOR. Inactivation of TSC2 thereby shifts cytosolic  
311 Rheb-GTP to perinuclear membranes, resulting in mTORC1 activation. Therefore, this spatial  
312 cycle enables mTORC1 activity to be regulated solely by inhibitory signals on the GAP, TSC2  
313 **(Fig. 7).**

314 The level of active GTP-bound Rheb in cells is higher than for most other GTPases (14, 15,  
315 40). It was reported that in the absence of GAP activity the GTP-bound state of Rheb is  
316 maintained by an auto-inhibitory conformation with slow intrinsic GTP-hydrolysis (45).  
317 Additionally, it was reported that the intrinsic nucleotide exchange rate of Rheb is markedly  
318 higher in solution than when bound to membranes (44). A guanine nucleotide exchange  
319 factor for Rheb that could accelerate the slow nucleotide exchange rate on membranes to  
320 overcome the TSC2 GAP activity has so far not been identified. However, the data presented  
321 here suggest that the nucleotide exchange of Rheb occurs in the cytosol. The solubilizing  
322 action of PDE $\delta$  shifts Rheb-GDP from membranes to the cytosol where its intrinsic  
323 nucleotide exchange rate is higher, thereby accumulating a pool of Rheb-GTP that can  
324 rapidly activate mTOR when deposited on membranes without TSC2 activity. In the absence  
325 of growth factors, Rheb-GTP is continuously cycled through the active TSC2-containing  
326 membranes by Arl2-mediated release from PDE $\delta$ . This maintains a steady state of inactive  
327 Rheb-GDP on perinuclear membranes that cannot activate mTOR. Upon growth factor  
328 induced inactivation of TSC2, the rate limiting step of mTOR activation is now determined by  
329 the Arl2/PDE $\delta$  mediated Rheb-GTP deposition on perinuclear membranes from the cytosolic  
330 pool. Although the passive process of PDE $\delta$  binding to prenylated Ras proteins in the cytosol  
331 occurs regardless of their nucleotide-bound state (35, 46), PDE $\delta$ -mediated solubilization of  
332 Rheb, is however an indispensable factor for efficient nucleotide exchange in the cytosol.

333 This is further corroborated by the increased GTP/GDP ratio of Rheb in cells harboring an  
334 intact TSC2 activity and a PDE $\delta$  knock out. Without the PDE $\delta$ -mediated solubilization, Rheb  
335 is no longer enriched at perinuclear compartments by Arl2-mediated localized release,  
336 resulting in an equilibration of Rheb to all endomembranes. This withdraws Rheb from  
337 hydrolysis at TSC2 bearing perinuclear compartments. Thus, activation of the mTORC1  
338 complex is reduced in those cells, despite an enhanced fraction of GTP-loaded Rheb.

339 We have shown that only Arl2, not Arl3, acts as an allosteric displacement factor of delivery  
340 of PDE $\delta$ -solubilized Rheb on perinuclear membranes, although it was reported that both  
341 Arl2 and Arl3 interact with PDE $\delta$  in a GTP-dependent manner (30). This is in agreement with  
342 previous studies that demonstrated that Arl2 knockdown was sufficient to disrupt the  
343 allosteric release of K-Ras from PDE $\delta$  (22). Structural and biochemical studies have shown  
344 that Arl3, but not Arl2 regulates the release of myristoylated ciliary proteins from different  
345 GDIs, UNC119a and UNC119b (47), further corroborating that only Arl2 displaces prenylated  
346 protein cargo from PDE $\delta$  *in vivo*. Arl2 and Arl3 interact with membranes via their N-terminal  
347 amphipathic helices (36), consistent with the observed significant enrichment of Arl2 on  
348 perinuclear membranes. Although this membrane binding is GTP-dependent for Arl3, Arl2  
349 binds membranes in a nucleotide-independent manner (36). We have however also  
350 observed a cytosolic pool of Arl2. It was reported that cytosolic Arl2 tightly binds the tubulin-  
351 specific chaperone cofactor D, and that Arl2 in this complex is mostly GDP-bound (48). It  
352 thus is likely that Arl2 also undergoes a cytosol-membrane spatial cycle, analogous to Rheb.  
353 This leaves the question open whether an Arl2 GEF that is partitioned to perinuclear  
354 membranes regulates its activation.



355 We have shown that cells with an intact RTK/PI3K/TSC signaling axis (TSC2+/+ MEFs) display  
356 a controlled response to activating stimuli, such as insulin. However, insensitivity to the  
357 activating inputs and hyperactivation of mTORC1 is a hallmark of various cancer cell lines  
358 (renal, colon and ovarian cancers) (49, 50), which carry mutations targeting mTORC1  
359 regulatory elements. Small molecules targeting mTOR in cancer, such as rapamycin, have  
360 been widely used. However, rapamycin inhibition results in the nonspecific activation of the  
361 PI3K/Akt pathway, enabling cancer cell proliferation via alternate routes (51, 52). On the  
362 other hand, disruption of PDE $\delta$ -mediated solubilization of Ras proteins, resulting in their  
363 mislocalization, was shown to be a viable strategy to inhibit proliferation of cells in Ras-  
364 driven cancer types (29, 32, 53).

365 PDE $\delta$ -mediated solubilization has been shown to be an essential factor in spatial cycle of Ras  
366 proteins, which maintain their subcellular localization (22, 24). Here we present a novel role  
367 of PDE $\delta$  for the Ras-related protein Rheb. Through solubilization, PDE $\delta$  not only counters  
368 equilibration of Rheb on all cell membranes, but most importantly, enables efficient  
369 nucleotide exchange on Rheb in the cytosol, leading to its reactivation.

370 This coupling of the generic activity of the PDE $\delta$ /Arl2-GTP mechanism to a stimulus-  
371 dependent localization of regulatory GAP enables tunable signal transduction of anabolic  
372 processes mediated by the Rheb/TSC/mTORC1 axis.

### 373 **Acknowledgements**

374 The project was funded by the European Research Council (ERC AdG 322637) to P.I.H.B. The  
375 authors would like to thank Prof. Dr. Aurelio Teleman, Dr. Constantinos Demetriades and

376 Prof. Dr. David Kwiatkowski for providing TSC2+/+ and TSC2-/- MEFs and Prof. Dr. Roger S.  
377 Goody for advice regarding the radioactivity experiments.

### 378 **Author Contributions**

379 P.I.H.B., M.K and C.H.K designed the experiments. M.K. and C.H.K. performed the  
380 experiments and the analysis. M.K and A.D.K. generated the sgRNAs for PDE $\delta$ . L.R.  
381 performed western blots and the GTP/GDP assay. A.S., A.D.K. and M.K. analyzed the PLA  
382 distribution. P.I.H.B., M.K., C.H.K. and A.U.K. wrote the manuscript.

### 383 **Competing interests**

384 The authors declare no competing interests.

### 385 **Data availability**

386 Data supporting the findings of this manuscript are available from the corresponding authors  
387 upon reasonable request.

388

389

## 390 **MATERIALS AND METHODS**

### 391 **Materials**

392 Primary antibodies used in this study were obtained from following sources: pS6P (S235/6)  
393 #4856 (1:1000 for WB), S6P #2317 (1:500 for WB), Rheb #13879 (1:500 for WB), TOR #2983  
394 (1:100 for IF), Rab7 #9376 (1:100 for IF) from Cell Signaling Technology; Arl2 ab183510  
395 (1:3000 for WB, 1:100 for IF, 1:2000 for PLA) and mCherry ab167453 (1:500 for WB) from  
396 Abcam, PDE6D H00005147-M06 (1:100 for IF, 1:1000 for PLA) and Rheb H00006009-M01  
397 (1:100 for IF) from Abnova, Rheb NBP2-50273 (1:12.5 for IP) from Novus Biologicals, Arl3  
398 10961-1-AP (1:300 for WB) from ProteinTech, PDE6D sc-50260 (1:300 for WB) from Santa  
399 Cruz Biotechnology, GFP #632381 (1:500 for WB) from Living Colors and  $\alpha$ -tubulin T6074  
400 (1:3000 for WB) from Sigma-Aldrich. Secondary antibodies for Western blot IRDye®680RD  
401 Donkey anti-rabbit, IRDye®800CW Donkey anti-mouse and IRDye®800CW Donkey anti-goat  
402 (1:5000 dilution) were purchased from LI-COR®, and secondary antibodies Alexa Fluor® 647  
403 donkey anti-rabbit A-31573 and Alexa Fluor® 488 donkey anti-mouse A-21202 (1:500  
404 dilution) used for IF were purchased from (Thermo Fisher Scientific).

405 Acrylamide and Precision Plus Protein™ standards were purchased from Bio-Rad  
406 Laboratories, Inc., APS, 2-Mercaptoethanol, NaCl, Triton X-1000 and Tween-20 from SERVA  
407 Electrophoresis GmbH, Bromophenolblue, Crystal Violet, Insulin (I9278), IGEPAL® CA-630,  
408 Phosphatase Inhibitor Cocktail 2 and 3, NaDOC, TEMED and DUOLINK® *In Situ* Detection  
409 Reagents FarRed (DUO92013) with PLA probes (DUO92005 and DUO92001) from Sigma  
410 Aldrich®, Complete Mini EDTA-free protease inhibitor tablets from Roche Applied Science,  
411 Na<sub>2</sub>HPO<sub>4</sub> and MgCl<sub>2</sub> from Merck, Ethanol, KH<sub>2</sub>PO<sub>4</sub>, KCL, Na<sub>4</sub>O<sub>7</sub>P<sub>2</sub> and Tris-HCl from J.T.Baker,

412 EDTA from Fluka<sup>®</sup> Analytical, EDTA from Life Science, Glycerol, kanamycin sulfate and DTT  
413 from GerbuBiotechnik GmbH, Glycine, Roti<sup>®</sup>-Histofix 4%, SDS and Tris-Base from Carl Roth  
414 GmbH, Methanol from AppliChem GmbH, Micro BCA<sup>™</sup> Protein Assay Kit from Thermo  
415 Scientific. ROTI<sup>®</sup>-Prep Plasmid mini kit for isolation of plasmid DNA was purchased from  
416 Roth, Zymoclean<sup>™</sup> Gel DNA Recovery Kit from Zymo Research and NucleoSEQ<sup>®</sup> Columns  
417 ansNucleoBond<sup>®</sup> Xtra Midi Plus EF kit for isolation of plasmid DNA from Macherey-Nagel.

418 All reagents for cell culture work, DPBS, DMEM, FCS, 100x NEAA, Penicilline/Streptomycin,  
419 Trypsin/EDTA and puromycin were purchased from PAN<sup>™</sup> Biotech GmbH.

420 Fugene<sup>®</sup> 6 transfection reagent was purchased from from Promega and Lipofectamine<sup>™</sup>  
421 2000 from Invitrogen<sup>™</sup> Life Technologies. Non-targeting RNA (DharmaconD-001810-10-05  
422 ON-TARGET plus Non-targetingTargeting Pool), siRNA Arl2 (L-063126-01-0005, ON-TARGET  
423 plus Mouse Arl2 (56327) siRNA - SMART pool, 5 nmol), siRNA Arl3 (L-041895-00-0005, ON-  
424 TARGET plus Mouse Arl3 (56350) siRNA - SMART pool, 5 nmol) and DharmaFECT 1 siRNA  
425 Transfection Reagent were purchased from Dharmacon.

## 426 **Methods**

### 427 **Plasmid construction**

428 Restriction and modification enzymes were purchased from New England Biolabs (NEB,  
429 Frankfurt am Main, Germany). PCR amplification reactions were performed with Q5 High-  
430 fidelity DNA polymerase according to the manufacturer's instructions (NEB). All PCR-derived  
431 constructs were verified by sequencing.

432 mCitrine-C1 vector was generated by insertion of AgeI/BsrGI PCR fragments of mCitrine (gift  
433 from R.Tsien) cDNA into pEGFP-C1 vector (Clontech, Saint-Germain-en-Laye, France). cDNA  
434 clones encoding full-length human *RHEB* (accession number: NM005614.3) were amplified  
435 by using primers that introduce an XhoI restriction site on 5' and EcoRI on 3' end in mCitrine-  
436 C1 vector to generate mCitrine-Rheb. mCherry-Rheb was generated by exchanging mCitrine-  
437 C1 fluorophore to mCitrine by cutting the vector at 5'NheI and 3' BsrGI site. Site-directed  
438 mutagenesis was performed on pEGFP-C1-Rheb to generate EYFP-Rheb Q64L.

439 mCitrine-Rheb HVR was generated by creating oligonucleotide corresponding to the last C-  
440 terminal 20 amino acids +CAAX-box (72 nucleotides) of full-length *RHEB*. The primers used  
441 for amplification of the PCR product were: ctgagatctcgagccaggataat (forward) and  
442 gactgcagaattctcacatcacc (reverse). The pECFP-C1 vector containing mCitrine-C1 was digested  
443 with XhoI on the 5' end and EcoRI on the 3' end, and ligated with Rheb-HVR amplified  
444 oligonucleotide using T4 ligase. After transformation of chemically competent XL-10  
445 *Escherichia coli* with the ligation mix and seeding the bacterial culture on agar plate  
446 supplemented with 50 µg/mL Kanamycin, positive clones were selected for further use. All  
447 constructs were verified by sequencing. Generation of the mCitrine-Rheb and mCherry-PDEδ  
448 constructs was described previously (24).

#### 449 **Cell culture**

450 TSC2 +/+ and TSC2 -/- MEFs were a kind gift from Prof. Aurelio Teleman (DKFZ, Heidelberg)  
451 with permission from Prof. David Kwiatkowski (Harvard). Cells were cultured in high glucose  
452 DMEM supplemented with 10% fetal calf serum, 1% non-essential amino acids, 1% L-  
453 Glutamine and 1% Pen/Strep antibiotic solution (PAN™ Biotech GmbH, Aidenbach, Germany)  
454 (full DMEM from here on). Cells were maintained in a humidified incubator with 5% CO<sub>2</sub> at

455 37°C. When starvation was necessary for the experiment, cells were washed once with 1x  
456 PBS, and starved overnight in high glucose DMEM without any supplements.

#### 457 **Generation of stably transfected cell lines**

458 The protocol for creating knockout cells via Crispr-Cas was described in (42). sgRNA was  
459 cloned into BbsI site of pSpCas9(BB)-2A-Puro (PX459) vector, Addgene number: 48139. The  
460 sgRNA sequences (5'- **CACCTCATGTCAGCCAAGGACGAG**-3' and 3'-  
461 **AAACCTCGTCCTTGGCTGACATGA**-5') targeted 5'UTR region of PDE $\delta$  mouse gene. They  
462 were generated using the online CRISPR Design Tool (<http://crispr.mit.edu>). The ligated  
463 sgRNA-pSpCas9 (BB)-2A-Puro plasmid, treated with PlasmidSafe was transformed in  
464 chemically competent Stbl3 bacteria on an agar plate with 100  $\mu$ g/mL ampicillin. From the  
465 cultures that grew at 37°C overnight, mini- and endonuclease-free midi-preps were  
466 performed.  $1 \times 10^6$  TSC2<sup>+/+</sup> and TSC2<sup>-/-</sup> MEFs were seeded in a 10-cm dish, and sgRNA-  
467 pSpCas9 (BB)-2A-Puro plasmid or pSpCas9 (BB)-2A-Puro (empty vector) were transfected  
468 using Fugene<sup>®</sup>HD transfection reagent. The next day 2 $\mu$ g/mL of puromycin was applied for  
469 selection of transfected cells. The media (full DMEM supplemented with puromycin) was  
470 exchanged every 2-3 days until cells were confluent enough for subculturing and  
471 cryopreservation.

472

#### 473 **Transient transfection**

474 Cells were seeded at  $1 \times 10^4$ /well density in a 4-well LabTek dish or  $1 \times 10^5$ /well density for 6-  
475 well dish in full DMEM. Cells were transfected with fluorescently tagged proteins at 80%  
476 confluency using Lipofectamine 2000 (Thermo Fischer Scientific, Dreiech, Germany) or

477 Fugene® HD (Promega, Mannheim, Germany) transfection reagent according to  
478 manufacturer's guidelines.

479  
480 **Arl2 knockdown**

481  $1 \times 10^5$  cells/well were seeded in 6-well plate or  $1 \times 10^4$ / well in a 4-well Labtek dish in DMEM  
482 supplemented with 10% fetal calf serum, 1% non-essential amino acids, 1% L-Glutamine and  
483 1% Pen/Strep antibiotic solution. Cells were transfected at 80% confluency with 50nM of  
484 non-targeting RNA, siRNA Arl2 or Arl3 by use of DharmaFECT 1 siRNA Transfection Reagent  
485 according to manufacturer's protocol (GE Dharmacon, Lafayette, USA). 7-10 hours post-  
486 transfection the medium was changed to full DMEM and cells were transfected with 0.25  $\mu$ g  
487 of mCitrine-Rheb cDNA. The image collection and cell-lysis was performed 48 hours post  
488 siRNA transfection.

489 **Microscopy**

490 Microscopic Imaging was carried out on a confocal microscope Leica TCS SP5 (Leica  
491 Microsystems), Olympus FluoroView FV1000 (Olympus) or wide field CellR (Olympus).  
492 Images from the Leica TCS SP5 were obtained at 512\*512 pixels at 400 Hz, with a 63\*1.4  
493 N.A. objective. The pinhole size was set to 250  $\mu$ m and fluorescence was detected with a  
494 photomultiplier tube (PMT) set at 1225 V. The 514 nM argon laser line at 30% power was  
495 used to excite mCitrine-Rheb and fluorescence was collected in the 525-625 nm spectral  
496 range. Images were acquired with 3 times line averaging and obtained every 2 minutes for 1  
497 hour.

498 On the Olympus FluoroView FV1000, DAPI/Hoechst was excited with 405 nm, mTFP with 458  
499 nm, mCitrine and Alexa488 with the 488 nm argon laser lines. mCherry was excited with the

500 561 nm line of a DPSS laser, and Alexa 647 with the 633 nm line of a HeNe laser. PLA puncta  
501 were imaged through a 40x /0.9 N.A. air objective, whereas a 60x /1.2 N.A. oil immersion  
502 objective was used otherwise. Fluorescence excitation/emission was selected through the  
503 dichroic mirrors DM 458/515 and DM 405/488/561/633, with the pinhole set at 250  $\mu$ m.  
504 Fluorescence spectral selection was through an acousto-optic tunable filter (AOTF) and SIM  
505 scanner. A 420-460 nm bandwidth was set for DAPI fluorescence detection, 498-552 nm for  
506 Alexa488 and mCitrine, 571-650 nm for mCherry and 655-755 nm for Alexa 647. Sequential  
507 imaging was performed with 3 averaged frames and by application of a Kalman filter.

508 Wide field images acquired on the CellR (Olympus) were obtained at 672\*512 pixels with a  
509 60x 1.2 N.A. oil immersion objective. DAPI fluorescence was obtained through a TagBFP+  
510 filter and far-red fluorescence through a cy5 filter at 66ms exposure time.

511 In all cases, live cell imaging was performed at 37°C with 5% CO<sub>2</sub>, whereas fixed samples  
512 were imaged at room temperature.

### 513 **Image processing**

514 Average background fluorescence was obtained from a cell free region and subtracted from  
515 all images. For time lapse series, a bleach correction was performed by normalizing the total  
516 image intensity of a frame to the average intensity of the starting image. Quantification of  
517 co-localization of Rab7/mTOR with endogenous Rheb or mCitrine-Rheb was done by masking  
518 the fluorescence of Rab7/mTOR by intensity-based thresholding. The ratio of Rheb/mCitrine-  
519 Rheb fluorescence in the resulting region of interest over total Rheb/mCitrine-Rheb  
520 fluorescence in the cells was then used as measure of the fraction of Rheb that localizes to  
521 Rab7/mTOR positive membranes.



522 A relative estimate of the soluble fraction of mCitrine-Rheb was obtained by calculating the  
523 nuclear over total mCitrine-Rheb fluorescence intensity. The perinuclear fraction was  
524 obtained by performing intensity-based thresholding on cells expressing mCitrine-Rheb and  
525 calculating the ratio of perinuclear over total cell mCitrine-Rheb intensity.

## 526 **Fluorescence Lifetime Imaging Microscopy (FLIM)**

527 Fluorescence lifetime images were acquired using a confocal laser-scanning microscope  
528 (FV1000, Olympus) equipped with a time-correlated single-photon counting module (LSM  
529 Upgrade Kit, Picoquant). For detection of the donor (mCitrine), the sample was excited using  
530 a 510 nm diode laser (LDH 507, Picoquant) at 36 MHz repetition frequency. Fluorescence  
531 signal was collected through an oil immersion objective (60x/1.35 UPlanSApo, Olympus) and  
532 spectrally filtered using a narrow-band emission filter (HQ 530/11, Chroma). Photons were  
533 detected using a single-photon counting avalanche photodiode (PDM Series, MPD) and  
534 timed using a single-photon counting module (PicoHarp 300, Picoquant). Data were analyzed  
535 by global analysis (34).

## 536 **Immunofluorescence**

537 One day post-transfection or seeding, cells were washed once with PBS, fixed with Roti®-  
538 Histofix (Carl Roth GmbH, Karlsruhe, Germany) for 10 minutes at RT and permeabilized for  
539 10 minutes with PBS+0.1% Triton X-100 (SERVA Electrophoresis GmbH, Heidelberg,  
540 Germany). The blocking was performed by applying Odyssey® Blocking Buffer (LI-COR  
541 Biosciences GmbH, Bad Homburg vor der Höhe, Germany) for 1h at RT. Primary antibodies  
542 were diluted at the recommended ratio (see Materials section) in Odyssey® Blocking Buffer  
543 and incubated overnight at 4°C. The next day, following 3x5minutes washing with PBS+0.1%

544 Tween-20 (SERVA Electrophoresis GmbH, Heidelberg, Germany), secondary antibodies were  
545 prepared in Odyssey® Blocking Buffer and incubated for 1h at RT. After final washing steps  
546 with PBS+ 0.1% Tween-20 of 3x5 minutes, PBS was added to cells and the cells were stored  
547 at 4°C until imaging.

#### 548 **Proximity Ligation Assay (PLA)**

549 8000 cells/well were seeded in an 8-well Labtek in full DMEM. The next day, the cells were  
550 once washed with PBS and fixed with Roti®-Histofix for 10 minutes, permeabilized with  
551 PBS+0.1% Triton X-100 for 10 minutes and blocked with a blocking solution (DUO92005-  
552 100RXN, Sigma-Aldrich®, Taufkirchen, Germany) for 1h at RT. Arl2 and PDEδ antibodies were  
553 diluted in Antibody diluent (DUO92005-100RXN, Sigma-Aldrich®, Taufkirchen, Germany), and  
554 applied separately (negative control) and together in individual wells, and incubated  
555 overnight at 4°C. The next day, the Duolink *in situ* PLA assay (DUO92013-100RXN, Sigma-  
556 Aldrich®, Taufkirchen, Germany) was performed according to manufacturer's instructions.  
557 Finally, the nuclei were stained with DAPI (Sigma-Aldrich®, Taufkirchen, Germany) diluted  
558 1:500 in PBS for 15 minutes. The cells were stored at 4°C in PBS until imaging.

#### 559 **PLA distribution analysis**

560 For the quantification of PLA puncta distributions, we calculated the distance between each  
561 punctum in 3-D confocal image stacks and the respective nuclear center. PLA puncta were  
562 identified using the Trackpy module ([github.com/soft-matter/trackpy](https://github.com/soft-matter/trackpy), DOI  
563 10.5281/zenodo.60550) in the Anaconda Python programming language (Python Software  
564 Foundation, version 2.7, <https://www.python.org/>). The nuclear envelope was calculated to  
565 estimate the nuclear center, mean nuclear radius as well as to identify which PLA puncta are

566 localized in the nucleus. Analogous analysis was performed on the 2-D projections on the  
567 focal plane for more accessible comparison to a reference random distribution, which was  
568 generated by calculating the distance of each pixel from the 2-D cell mask to the nuclear  
569 center. This embodies in essence a Monte Carlo approach, where each of the PLA puncta is  
570 randomly redistributed throughout the pixels of the cells mask multiple times with the final  
571 distribution being the estimated average distribution to the nuclear radius. Consequently,  
572 the cell shape and size determine the random distance distribution and therefore have  
573 influence on the sensitivity of the identification of perinuclear localization. Cells with less  
574 than 10 PLA puncta were excluded from the analysis.

575 Spatial bins represented in graphs in **Supplementary Fig. 1b** were created by subtracting  
576 values of the randomized puncta distribution from the experimentally obtained one. The size  
577 of individual bins corresponds to the division of the maximal size of the cell with the number  
578 of wanted bins.

### 579 **Segment analysis**

580 The analysis was made with an in-house developed software developed in Anaconda Python  
581 (Python Software Foundation, version 2.7, <https://www.python.org/>).

582 For the analysis of fluorescence intensity distributions in cells, nuclear and total cell masks  
583 for every cell were created in ImageJ 1.47k (<https://imagej.nih.gov/ij/>)

584 For each pixel in the cell, the distance ( $d$ ) to the nuclear membrane was normalized:

$$585 \quad d = dPM / (dPM + dNM)$$

586 Where  $dNM$  is the shortest distance to the nuclear membrane and  $dPM$  the shortest

587 distance to the plasma membrane.

588 According to the calculated distances, the cells were divided in 3 spatial bins (1 being closest  
589 to the plasma membrane and 3 being closest to the nuclear membrane), with equal radius  
590 between them (segment thickness identical across the cell). For angular masking, the center  
591 of the nucleus was determined and the intensity weighted 'center of the cell' and a central  
592 axis was fitted to these two points. An 60° angle around this axis was used for the analysis of  
593 the intensity distributions. Images for segmentation were defined to appear in a designated  
594 order, with a corresponding mean intensity profile for each segment. Each value of the  
595 segment was normalized to the sum of intensity in all segments, and the resulting mean  
596 value with the standard deviation was plotted in the graph. P values were determined by a  
597 Student's unpaired t-test. All values <0.05 were determined as not significant.

## 598 **Western blots**

599 TSC2<sup>+/+</sup> MEFs were seeded in  $1 \cdot 10^5$ , and TSC2<sup>-/-</sup> MEFs in  $8 \cdot 10^4$  density in full DMEM in a 6-  
600 well plate. The next day the cells were starved overnight and the following day treated with  
601 300 nM insulin (Sigma-Aldrich®, Taufkirchen, Germany) for 15 minutes before preparation of  
602 whole cell lysates, unless indicated differently. Cells were lysed with ice-cold RIPA buffer  
603 supplemented with Complete Mini EDTA free protease inhibitor (Roche Applied Science,  
604 Penzberg, Germany) and phosphatase inhibitor cocktail 2 and 3 (Sigma-Aldrich®,  
605 Taufkirchen, Germany), scraped after 10 minutes of incubation on ice and passed through a  
606 26G needle 5-7 times followed by centrifugation at 14 000 rpm, 4°C for 15 minutes. Protein  
607 concentration was determined using BCA assay, with BSA in different concentrations used as  
608 the standard. 25µg of whole cell-lysate was used for the SDS-PAGE. The gels were blotted to  
609 a polyvinylidene difluoride (PVDF) membrane, which was pre-activated with methanol for 5

610 minutes. After successful transfer, blocking was performed for 1 h by placing the membrane  
611 in Odyssey Infrared Imaging System blocking buffer. The antibodies were diluted in blocking  
612 buffer and incubated overnight at 4°C (for antibodies used and dilutions see section  
613 Materials). The next day, membranes were washed 3x5 minutes with 1xTBST (+ 0.1% Tween-  
614 20), followed incubation with secondary antibodies (diluted in blocking buffer) for 1h at RT.  
615 The membranes were again washed 3x5 minutes with 1x TBST (0.1% Tween) and protein  
616 detection was done with Odyssey Imaging System.

### 617 **Real-Time Cell Analyzer (RTCA)**

618 RTCA was performed using 16-well E-plates on the Dual Plate xCELLigence instrument (Roche  
619 Applied Science, Indianapolis, IN, USA). This system measures a dimensionless parameter  
620 called cell index (CI), which evaluates the ionic environment at an electrode/solution  
621 interface and integrates information on cell number. 5000 cells of TSC2 +/+, TSC2 +/+ E.V.  
622 and TSC2 +/+ sg RNA PDE $\delta$  MEFs and 3500 of TSC2 -/-, TSC2 -/- E.V. and TSC2p53-/- sg RNA  
623 PDE $\delta$  MEFs were plated in each well of the 16-well plates in 200  $\mu$ L of full DMEM. After  
624 seeding, cells were allowed to settle for 30 min at room temperature (RT) before being  
625 inserted into the xCELLigence instrument in a humidified incubator at 37°C with 5% CO<sub>2</sub>.  
626 Impedance measurements were then monitored every 15 min up to 200 hours. All assays  
627 were performed in duplicates. The growth rate was analyzed by calculating the slope of the  
628 curve between 40 and 60 hours by using the following formula:

$$629 \quad y = \frac{y_2 - y_1}{x_2 - x_1}$$

630 where y represents the average growth rate (slope) with y<sub>2</sub> the measured cell density at 60-  
631 hours (x<sub>2</sub>) and y<sub>1</sub> the measured cell density at 40 hours (x<sub>1</sub>).

632

### 633 **Colony formation assays**

634 100 cells/well were seeded in 6-well plate in full DMEM and incubated in a humidified  
635 incubator with 5% CO<sub>2</sub> at 37°C for 10 days. The medium was changed every 2 to 3 days to  
636 avoid deprivation of nutrients. Finally, cells were once washed with PBS, fixed with Roti®-  
637 Histofix for 10 minutes at RT, washed 3x with PBS and incubated with 0.01% (v/v) Crystal  
638 Violet (Sigma-Aldrich®, Taufkirchen, Germany). After 1 hour, Crystal Violet was aspirated;  
639 the wells were washed 2-3 times with ddH<sub>2</sub>O and left for drying. The plates were scanned  
640 with Typhoon TRIO + scanner (Amersham Biosciences, Little Chalfont, UK) and analyzed  
641 using a script from (54).

### 642 **Nucleotide loading state of Rheb**

643 Radioactive nucleotide labeling was performed in a variation of the method described by  
644 (55). In brief, cells were starved for 18h in phosphate-free DMEM. Then, cells were washed  
645 and incubated for 5h in phosphate-free DMEM containing 0.15 mCi [32P]-orthophosphate.  
646 Afterwards, cells were lysed with lysis buffer (50 mM Tris pH 7.4, 140 mM NaCl, 1% Triton X-  
647 100, 1% IGEPAL CA-360, 1 mM KCl, 2 mM MgCl<sub>2</sub>, 1x EDTA-free protease inhibitor cocktail)  
648 and centrifuged for 15 min, 4°C, 13,000 rpm. Lysates were pre-cleared with Protein A-  
649 Sepharose before immunoprecipitation of Rheb with an anti-Rheb antibody bound to  
650 Protein A-Sepharose beads (ratio 1:12.5) for 45 min at 4°C on a rotator. Immunoprecipitates  
651 were washed six times with washing buffer (50 mM Hepes pH 7.4, 500 mM NaCl, 0.1% Triton  
652 X-100, 0.005% SDS, 5 mM MgCl<sub>2</sub>). Afterwards, supernatant was removed with a syringe  
653 (G27) and GTP/GDP were eluted from the beads with elution buffer (2 mM EDTA, 0.2% SDS,  
654 1 mM GDP, 1 mM GTP) for 20 min at 68°C. To separate GTP and GDP fractions, thin layer

655 chromatography (TLC) was performed on PEI-cellulose plates developed in 1 M  $\text{KH}_2\text{PO}_4$  pH  
656 3.4. Diluted [ $\alpha$ - $^{32}\text{P}$ ]-GTP, either untreated or treated with 0.001 units of Shrimp Alkaline  
657 Phosphatase (NEB) on ice, were spotted as reference on every plate. Afterwards, dried  
658 plates were exposed to storage phosphor screens for 5 - 8 days and scanned on a Typhoon  
659 Trio Imager. The intensity profile of each TLC lane was plotted using Fiji and analyzed by  
660 Multi-peak fitting and background correction using IGOR Pro, version 6.37. The resulting  
661 intensity values for the GTP and GDP spots were divided by the factor three and two,  
662 respectively, to account for the number of phosphate groups per nucleotide, and the  
663 percentage of GTP was determined as  $\text{GTP}/(\text{GTP}+\text{GDP}) \times 100\%$ .

664

665

## 666 **References**

- 667 1. Fingar DC, Salama S, Tsou C, Harlow E, Blenis J. Mammalian cell size is controlled  
668 by mTOR and its downstream targets S6K1 and 4EBP1/eIF4E. *Genes & development*.  
669 2002;16(12):1472-87.
- 670 2. Guertin DA, Sabatini DM. Defining the role of mTOR in cancer. *Cancer Cell*.  
671 2007;12(1):9-22.
- 672 3. Jung CH, Ro SH, Cao J, Otto NM, Kim DH. mTOR regulation of autophagy. *FEBS*  
673 *letters*. 2010;584(7):1287-95.
- 674 4. Laplante M, Sabatini DM. mTOR signaling in growth control and disease. *Cell*.  
675 2012;149(2):274-93.
- 676 5. Sekiguchi T, Hirose E, Nakashima N, Ii M, Nishimoto T. Novel G proteins, Rag C  
677 and Rag D, interact with GTP-binding proteins, Rag A and Rag B. *The Journal of biological*  
678 *chemistry*. 2001;276(10):7246-57.
- 679 6. Kim E, Goraksha-Hicks P, Li L, Neufeld TP, Guan KL. Regulation of TORC1 by Rag  
680 GTPases in nutrient response. *Nature cell biology*. 2008;10(8):935-45.
- 681 7. Sancak Y, Peterson TR, Shaul YD, Lindquist RA, Thoreen CC, Bar-Peled L, et al.  
682 The Rag GTPases bind raptor and mediate amino acid signaling to mTORC1. *Science*.  
683 2008;320(5882):1496-501.
- 684 8. Dibble CC, Elis W, Menon S, Qin W, Klekota J, Asara JM, et al. TBC1D7 is a third  
685 subunit of the TSC1-TSC2 complex upstream of mTORC1. *Molecular cell*. 2012;47(4):535-  
686 46.
- 687 9. Zhang Y, Gao X, Saucedo LJ, Ru B, Edgar BA, Pan D. Rheb is a direct target of the  
688 tuberous sclerosis tumour suppressor proteins. *Nature cell biology*. 2003;5(6):578-81.



- 689 10. Demetriades C, Doumpas N, Teleman AA. Regulation of TORC1 in response to  
690 amino acid starvation via lysosomal recruitment of TSC2. *Cell*. 2014;156(4):786-99.
- 691 11. Menon S, Dibble CC, Talbott G, Hoxhaj G, Valvezan AJ, Takahashi H, et al. Spatial  
692 control of the TSC complex integrates insulin and nutrient regulation of mTORC1 at the  
693 lysosome. *Cell*. 2014;156(4):771-85.
- 694 12. Ma XM, Blenis J. Molecular mechanisms of mTOR-mediated translational control.  
695 *Nat Rev Mol Cell Biol*. 2009;10(5):307-18.
- 696 13. Wullschleger S, Loewith R, Hall MN. TOR signaling in growth and metabolism. *Cell*.  
697 2006;124(3):471-84.
- 698 14. Inoki K, Li Y, Xu T, Guan KL. Rheb GTPase is a direct target of TSC2 GAP activity  
699 and regulates mTOR signaling. *Genes & development*. 2003;17(15):1829-34.
- 700 15. Im E, von Lintig FC, Chen J, Zhuang S, Qui W, Chowdhury S, et al. Rheb is in a high  
701 activation state and inhibits B-Raf kinase in mammalian cells. *Oncogene*. 2002;21(41):6356-  
702 65.
- 703 16. Yamagata K, Sanders LK, Kaufmann WE, Yee W, Barnes CA, Nathans D, et al. rheb,  
704 a growth factor- and synaptic activity-regulated gene, encodes a novel Ras-related protein.  
705 *The Journal of biological chemistry*. 1994;269(23):16333-9.
- 706 17. Hancock JF, Magee AI, Childs JE, Marshall CJ. All ras proteins are polyisoprenylated  
707 but only some are palmitoylated. *Cell*. 1989;57(7):1167-77.
- 708 18. Casey PJ, Solski PA, Der CJ, Buss JE. p21ras is modified by a farnesyl isoprenoid.  
709 *Proceedings of the National Academy of Sciences of the United States of America*.  
710 1989;86(21):8323-7.
- 711 19. Clark GJ, Kinch MS, Rogers-Graham K, Sebt SM, Hamilton AD, Der CJ. The Ras-  
712 related protein Rheb is farnesylated and antagonizes Ras signaling and transformation. *The*  
713 *Journal of biological chemistry*. 1997;272(16):10608-15.

- 714 20. Hancock JF, Cadwallader K, Paterson H, Marshall CJ. A CAAX or a CAAL motif and  
715 a second signal are sufficient for plasma membrane targeting of ras proteins. *Embo j.*  
716 1991;10(13):4033-9.
- 717 21. Rocks O, Gerauer M, Vartak N, Koch S, Huang ZP, Pechlivanis M, et al. The  
718 palmitoylation machinery is a spatially organizing system for peripheral membrane proteins.  
719 *Cell.* 2010;141(3):458-71.
- 720 22. Schmick M, Vartak N, Papke B, Kovacevic M, Truxius DC, Rossmannek L, et al.  
721 KRas localizes to the plasma membrane by spatial cycles of solubilization, trapping and  
722 vesicular transport. *Cell.* 2014;157(2):459-71.
- 723 23. Michaelson D, Ali W, Chiu VK, Bergo M, Silletti J, Wright L, et al. Postprenylation  
724 CAAX processing is required for proper localization of Ras but not Rho GTPases. *Mol Biol*  
725 *Cell.* 2005;16(4):1606-16.
- 726 24. Chandra A, Grecco HE, Pisupati V, Perera D, Cassidy L, Skoulidis F, et al. The GDI-  
727 like solubilizing factor PDEdelta sustains the spatial organization and signalling of Ras family  
728 proteins. *Nature cell biology.* 2012;14(2):148-58.
- 729 25. Takahashi K, Nakagawa M, Young SG, Yamanaka S. Differential membrane  
730 localization of ERas and Rheb, two Ras-related proteins involved in the phosphatidylinositol  
731 3-kinase/mTOR pathway. *The Journal of biological chemistry.* 2005;280(38):32768-74.
- 732 26. Buerger C, DeVries B, Stambolic V. Localization of Rheb to the endomembrane is  
733 critical for its signaling function. *Biochemical and biophysical research communications.*  
734 2006;344(3):869-80.
- 735 27. Saito K, Araki Y, Kontani K, Nishina H, Katada T. Novel role of the small GTPase  
736 Rheb: its implication in endocytic pathway independent of the activation of mammalian target  
737 of rapamycin. *J Biochem.* 2005;137(3):423-30.

- 738 28. Yadav RB, Burgos P, Parker AW, Iadevaia V, Proud CG, Allen RA, et al. mTOR  
739 direct interactions with Rheb-GTPase and raptor: sub-cellular localization using fluorescence  
740 lifetime imaging. *BMC Cell Biol.* 2013;14:3.
- 741 29. Zimmermann G, Papke B, Ismail S, Vartak N, Chandra A, Hoffmann M, et al. Small  
742 molecule inhibition of the KRAS-PDEdelta interaction impairs oncogenic KRAS signalling.  
743 *Nature.* 2013;497(7451):638-42.
- 744 30. Ismail SA, Chen YX, Rusinova A, Chandra A, Bierbaum M, Gremer L, et al. Arl2-  
745 GTP and Arl3-GTP regulate a GDI-like transport system for farnesylated cargo. *Nature*  
746 *chemical biology.* 2011;7(12):942-9.
- 747 31. Schmick M, Kraemer A, Bastiaens PI. Ras moves to stay in place. *Trends in cell*  
748 *biology.* 2015;25(4):190-7.
- 749 32. Papke B, Murarka S, Vogel HA, Martín-Gago P, Kovacevic M, Truxius DC, et al.  
750 Identification of pyrazolopyridazinones as PDE $\delta$  inhibitors. *Nature communications.*  
751 2016;7:11360.
- 752 33. Martin-Gago P, Fansa EK, Klein CH, Murarka S, Janning P, Schurmann M, et al. A  
753 PDE6delta-KRas Inhibitor Chemotype with up to Seven H-Bonds and Picomolar Affinity that  
754 Prevents Efficient Inhibitor Release by Arl2. *Angew Chem Int Ed Engl.* 2017;56(9):2423-8.
- 755 34. Grecco HE, Roda-Navarro P, Verveer PJ. Global analysis of time correlated single  
756 photon counting FRET-FLIM data. *Optics express.* 2009;17(8):6493-508.
- 757 35. Hanzal-Bayer M, Renault L, Roversi P, Wittinghofer A, Hillig RC. The complex of  
758 Arl2-GTP and PDE delta: from structure to function. *The EMBO journal.* 2002;21(9):2095-  
759 106.
- 760 36. Kapoor S, Fansa EK, Mobitz S, Ismail SA, Winter R, Wittinghofer A, et al. Effect of  
761 the N-Terminal Helix and Nucleotide Loading on the Membrane and Effector Binding of  
762 Arl2/3. *Biophys J.* 2015;109(8):1619-29.

- 763 37. Soderberg O, Gullberg M, Jarvius M, Ridderstrale K, Leuchowius KJ, Jarvius J, et al.  
764 Direct observation of individual endogenous protein complexes in situ by proximity ligation.  
765 Nature methods. 2006;3(12):995-1000.
- 766 38. Koos B, Andersson L, Clausson CM, Grannas K, Klaesson A, Cane G, et al. Analysis  
767 of protein interactions in situ by proximity ligation assays. Current topics in microbiology and  
768 immunology. 2014;377:111-26.
- 769 39. Zhang H, Cicchetti G, Onda H, Koon HB, Asrican K, Bajraszewski N, et al. Loss of  
770 Tsc1/Tsc2 activates mTOR and disrupts PI3K-Akt signaling through downregulation of  
771 PDGFR. The Journal of clinical investigation. 2003;112(8):1223-33.
- 772 40. Garami A, Zwartkuis FJ, Nobukuni T, Joaquin M, Roccio M, Stocker H, et al. Insulin  
773 activation of Rheb, a mediator of mTOR/S6K/4E-BP signaling, is inhibited by TSC1 and 2.  
774 Molecular cell. 2003;11(6):1457-66.
- 775 41. Jinek M, Chylinski K, Fonfara I, Hauer M, Doudna JA, Charpentier E. A  
776 programmable dual-RNA-guided DNA endonuclease in adaptive bacterial immunity. Science.  
777 2012;337(6096):816-21.
- 778 42. Ran FA, Hsu PD, Wright J, Agarwala V, Scott DA, Zhang F. Genome engineering  
779 using the CRISPR-Cas9 system. Nature protocols. 2013;8(11):2281-308.
- 780 43. Li Y, Inoki K, Guan KL. Biochemical and functional characterizations of small  
781 GTPase Rheb and TSC2 GAP activity. Molecular and cellular biology. 2004;24(18):7965-75.
- 782 44. Mazhab-Jafari MT, Marshall CB, Stathopoulos PB, Kobashigawa Y, Stambolic V, Kay  
783 LE, et al. Membrane-dependent modulation of the mTOR activator Rheb: NMR observations  
784 of a GTPase tethered to a lipid-bilayer nanodisc. J Am Chem Soc. 2013;135(9):3367-70.
- 785 45. Mazhab-Jafari MT, Marshall CB, Ishiyama N, Ho J, Di Palma V, Stambolic V, et al.  
786 An autoinhibited noncanonical mechanism of GTP hydrolysis by Rheb maintains mTORC1  
787 homeostasis. Structure (London, England : 1993). 2012;20(9):1528-39.

- 788 46. Nancy V, Callebaut I, El Marjou A, de Gunzburg J. The delta subunit of retinal rod  
789 cGMP phosphodiesterase regulates the membrane association of Ras and Rap GTPases. *The*  
790 *Journal of biological chemistry*. 2002;277(17):15076-84.
- 791 47. Ismail SA, Chen Y-X, Miertzschke M, Vetter IR, Koerner C, Wittinghofer A.  
792 Structural basis for Arl3-specific release of myristoylated ciliary cargo from UNC119. *The*  
793 *EMBO journal*. 2012;31(20):4085-94.
- 794 48. Shern JF, Sharer JD, Pallas DC, Bartolini F, Cowan NJ, Reed MS, et al. Cytosolic  
795 Arl2 is complexed with cofactor D and protein phosphatase 2A. *The Journal of biological*  
796 *chemistry*. 2003;278(42):40829-36.
- 797 49. Sato T, Nakashima A, Guo L, Coffman K, Tamanoi F. Single amino-acid changes that  
798 confer constitutive activation of mTOR are discovered in human cancer. *Oncogene*.  
799 2010;29(18):2746-52.
- 800 50. Grabiner BC, Nardi V, Birsoy K, Possemato R, Shen K, Sinha S, et al. A diverse array  
801 of cancer-associated MTOR mutations are hyperactivating and can predict rapamycin  
802 sensitivity. *Cancer discovery*. 2014;4(5):554-63.
- 803 51. Carracedo A, Ma L, Teruya-Feldstein J, Rojo F, Salmena L, Alimonti A, et al.  
804 Inhibition of mTORC1 leads to MAPK pathway activation through a PI3K-dependent  
805 feedback loop in human cancer. *The Journal of clinical investigation*. 2008;118(9):3065-74.
- 806 52. Choo AY, Blenis J. Not all substrates are treated equally: implications for mTOR,  
807 rapamycin-resistance and cancer therapy. *Cell cycle (Georgetown, Tex)*. 2009;8(4):567-72.
- 808 53. Klein CH, Truxius DC, Vogel HA, Harizanova J, Murarka S, Martin-Gago P, et al.  
809 PDEdelta inhibition impedes the proliferation and survival of human colorectal cancer cell  
810 lines harboring oncogenic KRas. *Int J Cancer*. 2018.

811 54. Guzman C, Bagga M, Kaur A, Westermarck J, Abankwa D. ColonyArea: an ImageJ  
812 plugin to automatically quantify colony formation in clonogenic assays. PloS one.  
813 2014;9(3):e92444.

814 55. Wolthuis RM, de Ruiter ND, Cool RH, Bos JL. Stimulation of gene induction and cell  
815 growth by the Ras effector Rlf. The EMBO journal. 1997;16(22):6748-61.

816

817

818 **Supplementary files**

819 Supplementary information contains Supplementary Fig. 1-9

820

Figure 1.

a

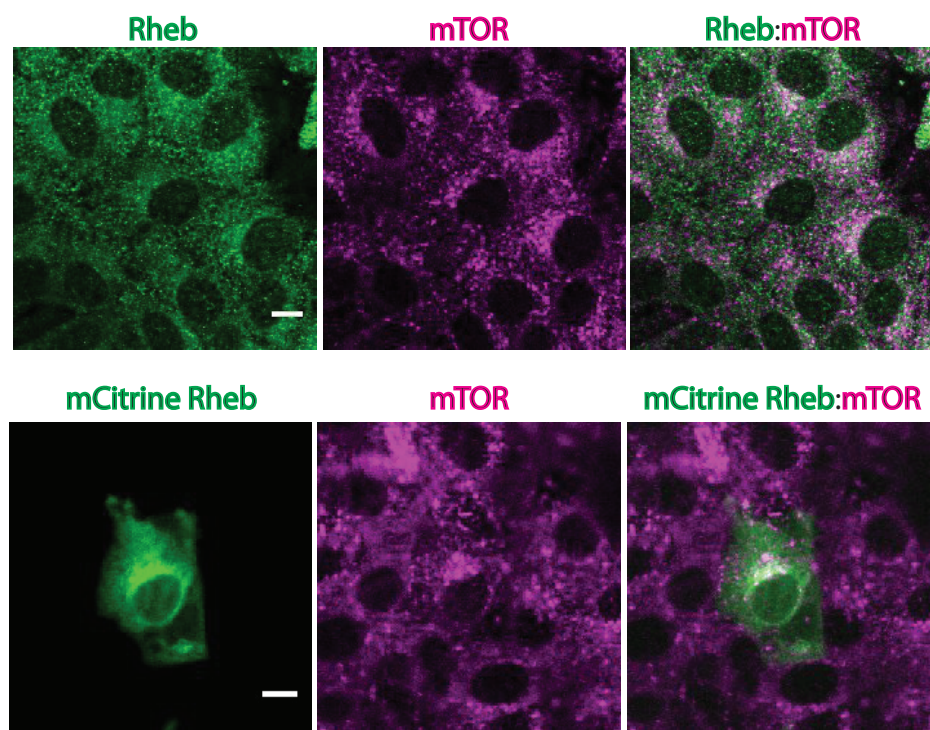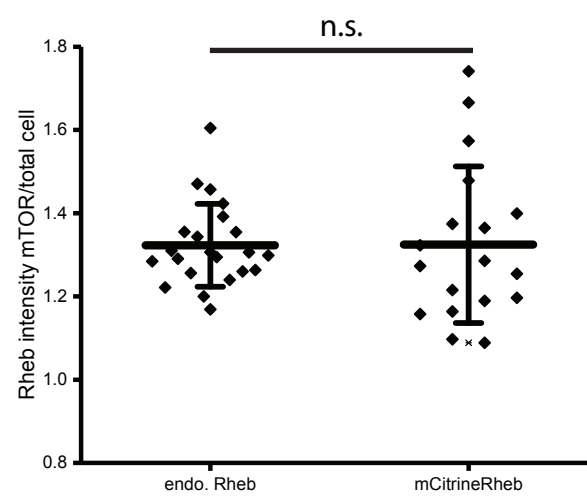

b

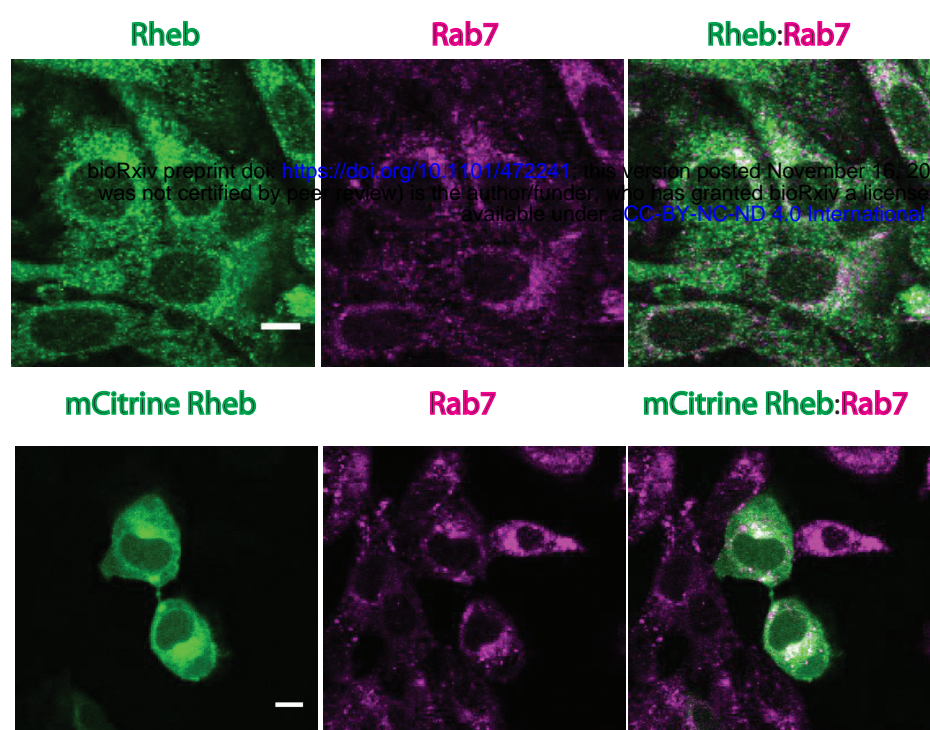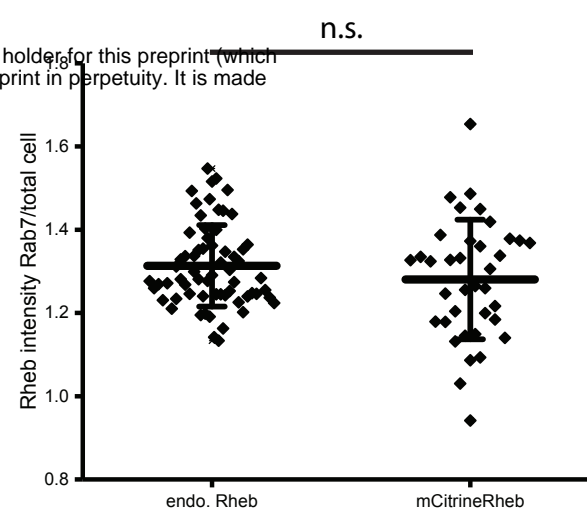

c

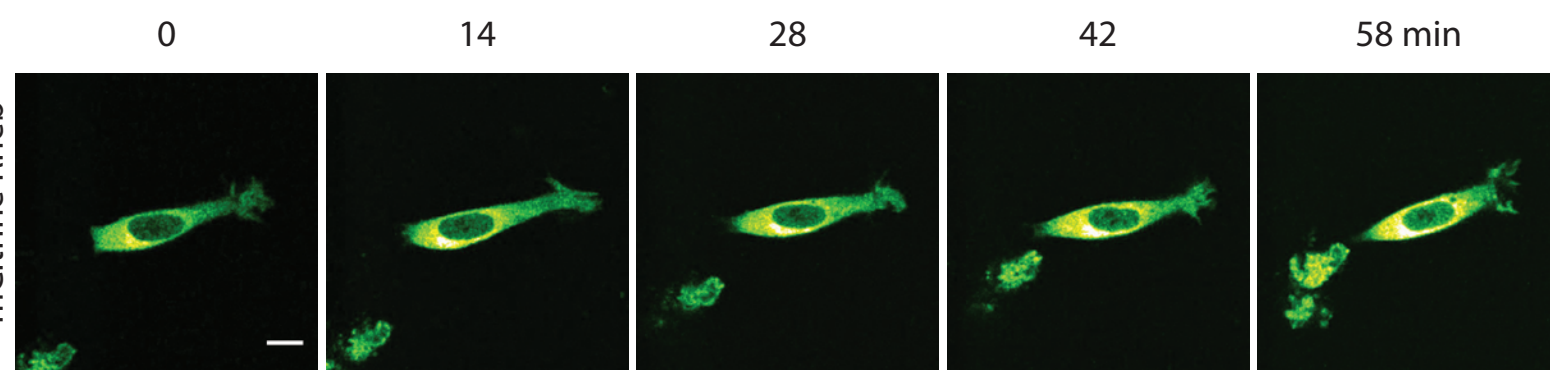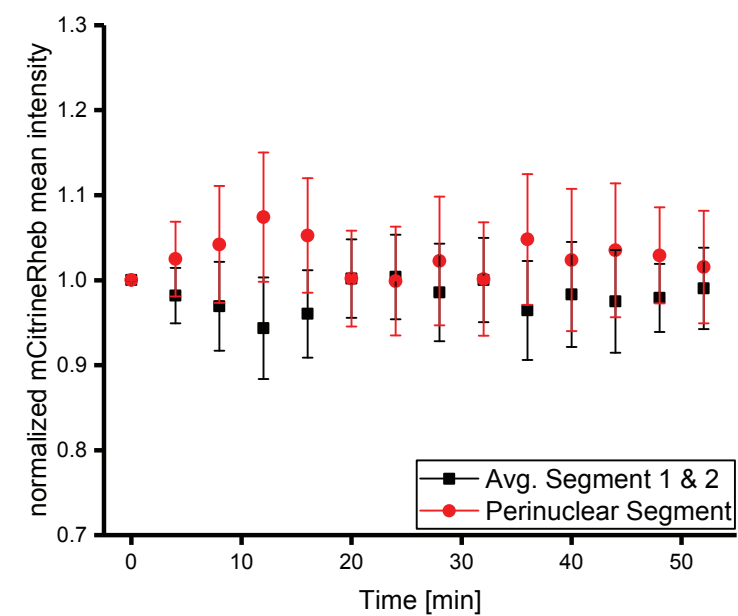

d

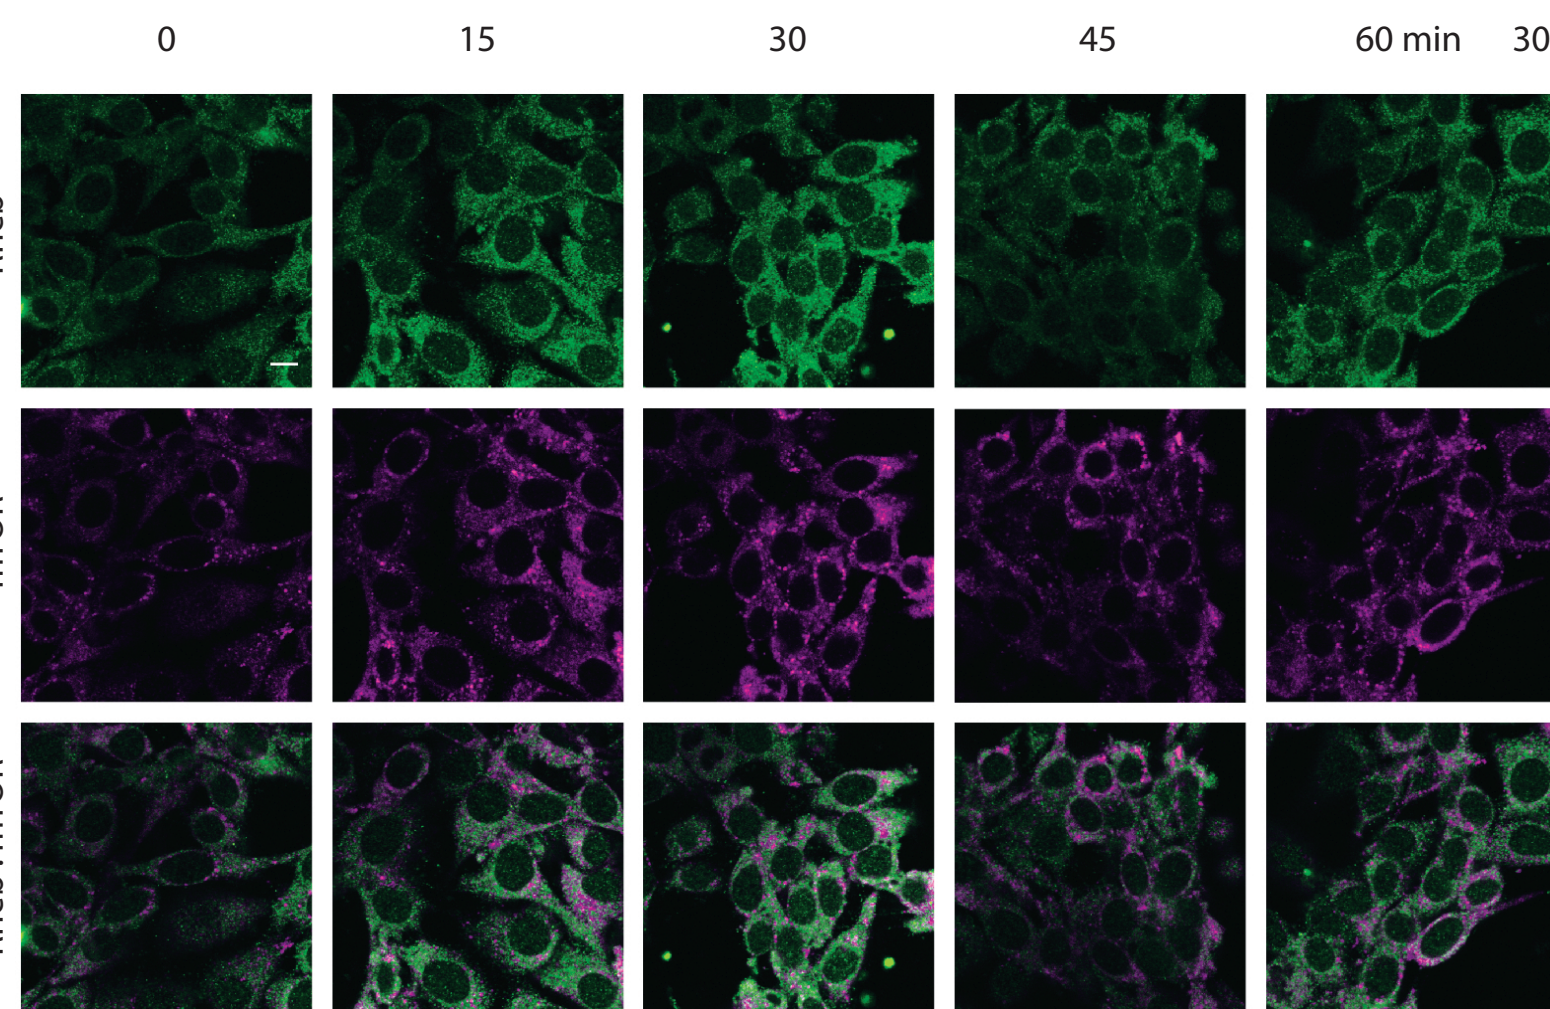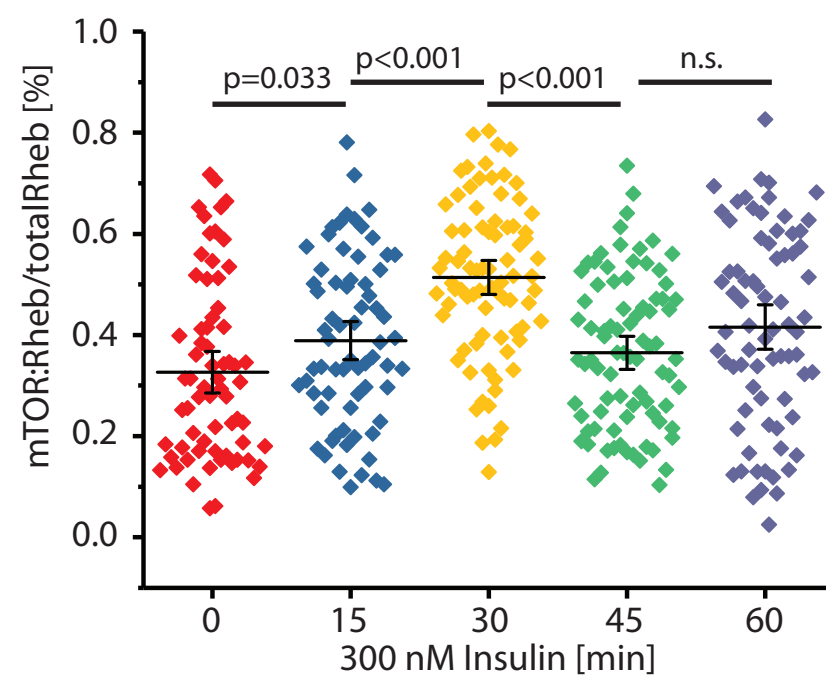

**Fig. 1.**

**Rheb partitioning to perinuclear membranes is enhanced by insulin. (a,b)** Confocal micrographs of TSC2<sup>+/+</sup> MEFs depicting the spatial distribution of immunofluorescence signal for mTOR **(a)** and Rab7 **(b)** with endogenous Rheb (upper row) or mCitrine-Rheb (lower row). Graphs: Ratio of Rheb or mCitrine-Rheb co-localizing with mTOR **(a)** or Rab7 **(b)** over total cell Rheb or mCitrine-Rheb for individual cells with mean fluorescence intensity  $\pm$  S.D. ( $n > 20$  cells per condition from two independent experiments). P-values were obtained by Student's t-test,  $> 0.05$  labeled as not significant (n.s.). **(c)** Time series of serum-starved TSC2<sup>+/+</sup> MEFs expressing mCitrine-Rheb treated with 300 nM insulin. Rheb spatial distribution was determined by segmenting cells into 3 segments of equal radius from the plasma membrane (PM) to the nuclear membrane (NM) (1-3) and calculating the mean fluorescence intensity in each segment normalized to the total intensity in all three segments (see Methods). Black: normalized average of 1<sup>st</sup> and 2<sup>nd</sup> segment; red: normalized average of perinuclear 3<sup>rd</sup> segment. Error bars depict s.d.;  $n = 7$  cells from two independent experiments. **(d)** Left: Confocal micrographs of serum-starved TSC2<sup>+/+</sup> MEFs depicting localization of immunofluorescence signal for endogenous Rheb (first row) and mTOR (second row) at different time points after 300 nM insulin stimulation. Third row: overlaid images. Right: Fraction of Rheb mean fluorescence intensity co-localizing with mTOR fluorescence in single cells ( $n > 67$  for each condition from two independent experiments). Line depicts mean and error bars depict 95% confidence interval. P-values were obtained by one-way ANOVA. Scale bars: 10  $\mu$ m.



# Figure 2.

bioRxiv preprint doi: <https://doi.org/10.1101/472241>; this version posted November 16, 2018. The copyright holder for this preprint (which was not certified by peer review) is the author/funder, who has granted bioRxiv a license to display the preprint in perpetuity. It is made available under aCC-BY-NC-ND 4.0 International license.

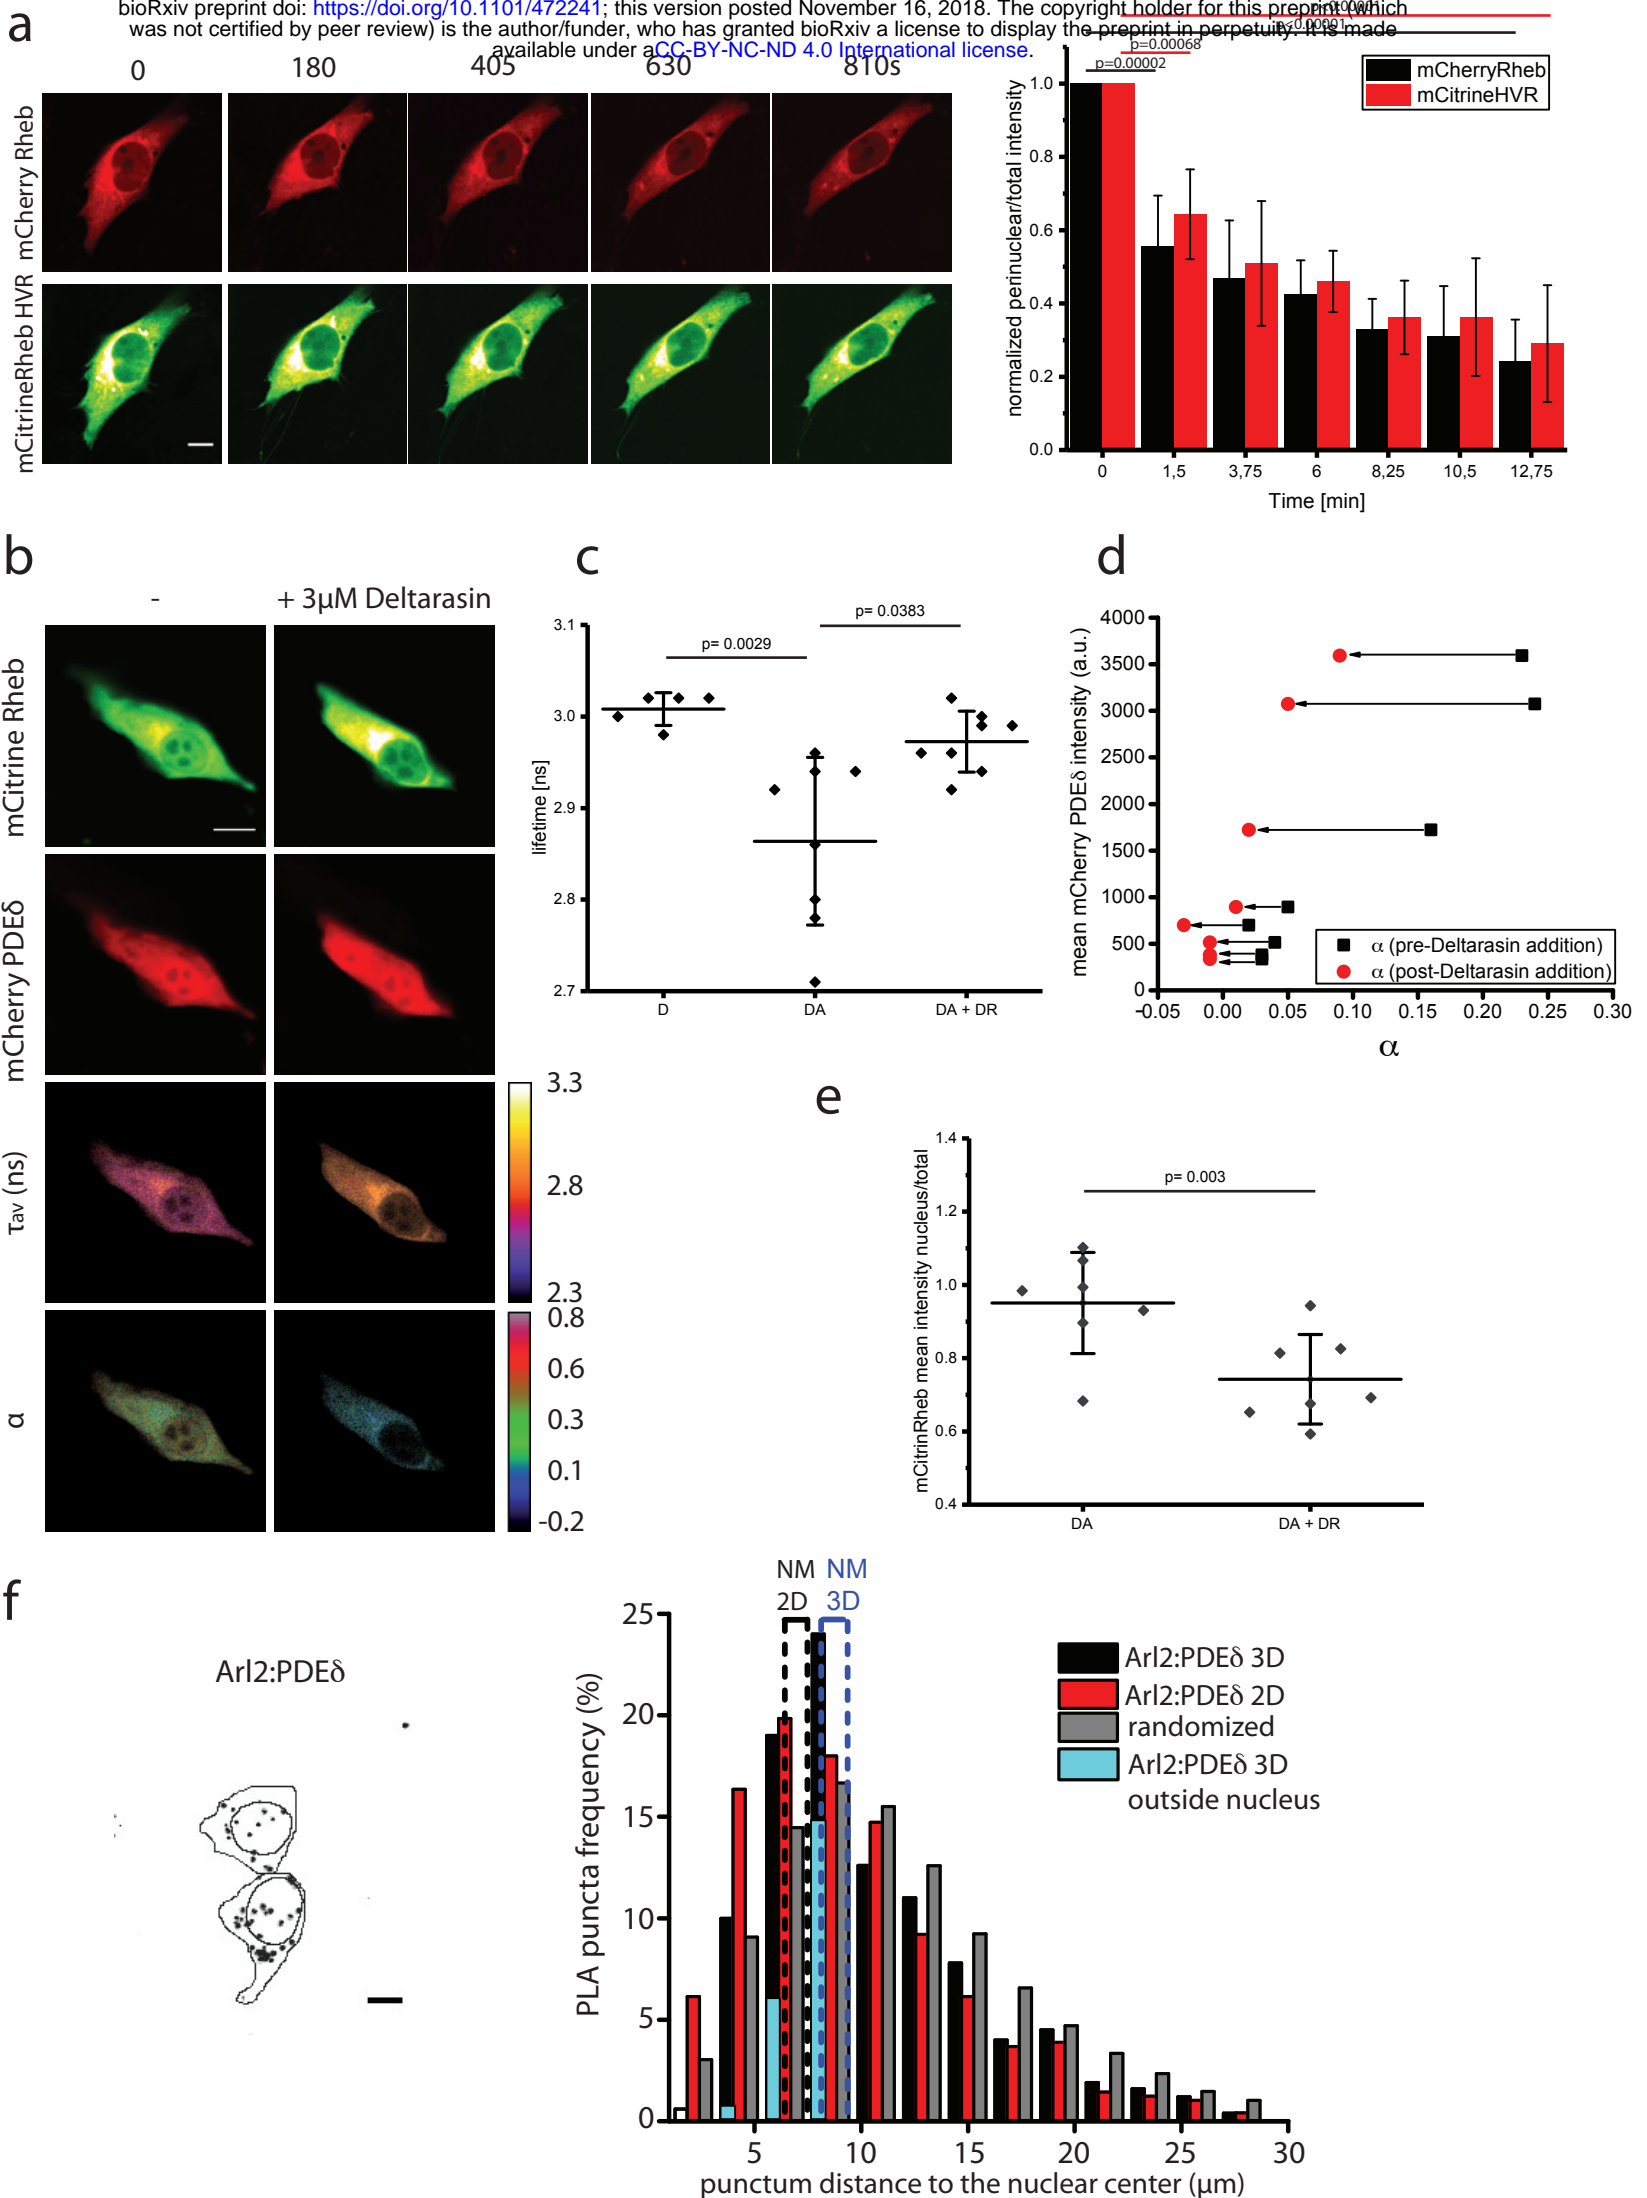

**Fig. 2.**

**PDE $\delta$  interacts with Rheb in the cytoplasm and Arl2 on perinuclear membranes. (a)**

Time series of TSC2+/+ MEFs co-expressing mCherry-Rheb (upper row) and mCitrine-Rheb-HVR (lower row), treated with 3 $\mu$ M Deltarasin at t=0 s. Right plot: normalized perinuclear over total fluorescence of mCherry-Rheb (black) and mCitrine-Rheb-HVR (red) over time (N=4). **(b-e)** FRET-FLIM measurements of mCitrine-Rheb and mCherry-PDE $\delta$  interaction in TSC2+/+ MEFs, before (-) and 30 min after addition of 3  $\mu$ M Deltarasin. **(b)** Fluorescence intensity of the indicated proteins (upper two rows), spatial distribution of the mean fluorescence lifetime ( $\tau_{av}$ ) (third row) and the molar fraction of interacting molecules ( $\alpha$ ) (fourth row). **(c)**  $\tau_{av}$  of donor only (D), donor-acceptor complex (DA) and donor-acceptor complex after Deltarasin addition (DA+DR) in nanoseconds (n=8 cells). **(d)** Change in  $\alpha$  after Deltarasin addition as function of mCherry-PDE $\delta$  expression in individual cells. Black arrows: decrease in  $\alpha$  after Deltarasin addition. **(e)** Graph depicting the ratio of mean nuclear over total cell mCitrine-Rheb intensity before (DA) and after Deltarasin addition (DA+DR). **(f)** Representative maximum intensity projection of a confocal Z-stack of Arl2-PDE $\delta$  PLA fluorescent interaction puncta (left) from TSC2+/+ MEFs. The cell outline was determined from the integrated fluorescence images of the stack, while nuclei were identified with DAPI staining. Histogram (right) depicts the mean distribution of distances of Arl2/PDE $\delta$  PLA puncta to the nuclear centre obtained from 3D cell volumes (black) and corresponding 2D maximal intensity projections (red). For comparison, the mean distance distribution of all pixels within cells (grey) is shown. Dotted lines represent the average position of the nuclear membrane (NM) for both 3D (blue) and 2D-projections (black). Puncta detected in 3D as positioned outside of the nucleus but within the nuclear/perinuclear segments are represented in turquoise (n= 33 cells, data from 2 independent experiments). P-values obtained by Student's t-test. Scale bars: 10  $\mu$ m. All data are mean $\pm$ S.D.

Figure 3.

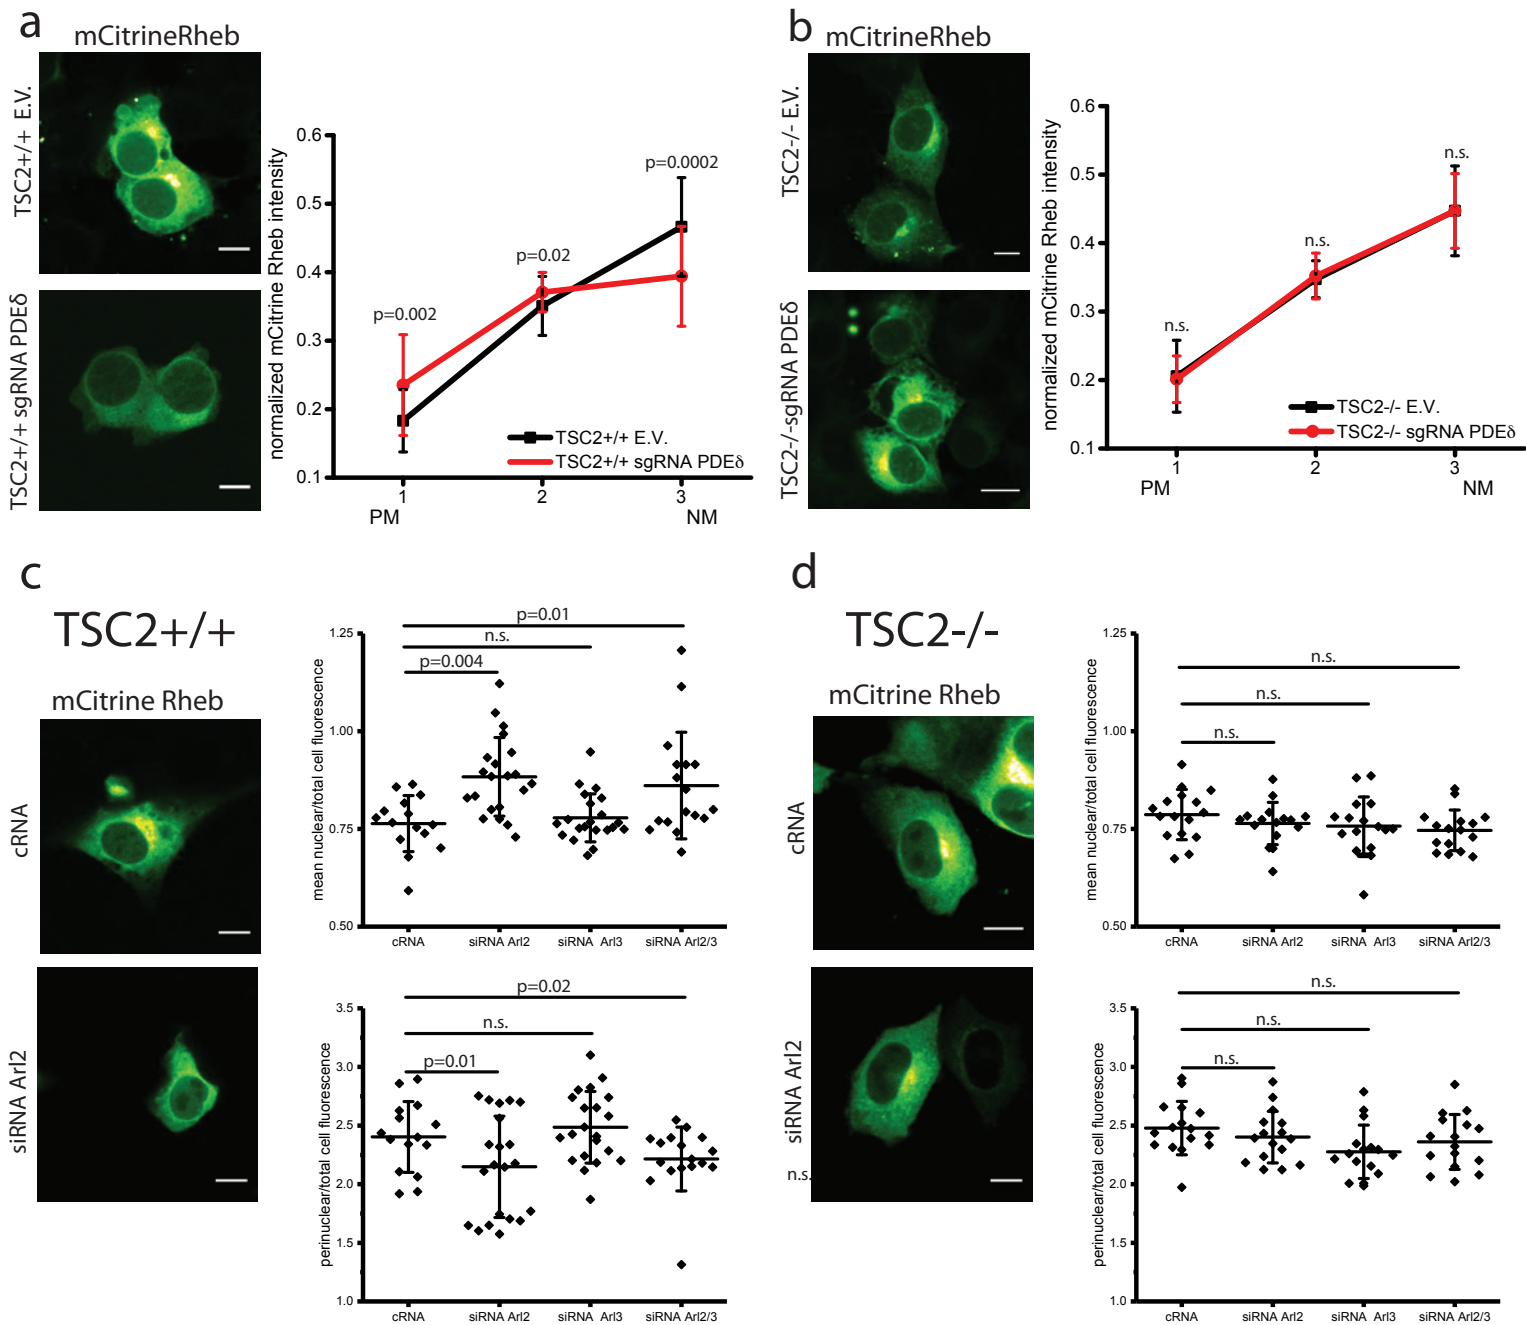

**Fig. 3.**

**The PDE $\delta$ /Arl2 system maintains Rheb localization.** Localization distribution of Rheb variants in TSC2+/+ MEFs (**a**) and TSC2-/- MEFs (**b**) stably expressing either an empty Cas9 vector (E.V.) or a Cas9 vector encoding a single guide RNA for silencing PDE $\delta$  (sgRNA PDE $\delta$ ), ectopically expressing mCitrine-Rheb (**a,b**). The steady state localization of mCitrine-Rheb was determined by segment analysis with angular masking. Radial profiles depict the normalized fluorescence intensity in each segment ( $n > 15$  cells for each cell line from two independent experiments). (**c,d**) Dependence of Rheb localization on Arl2/3 in TSC2+/+ (**c**) and TSC2-/- MEFs (**d**). Representative maximum intensity projections (left micrographs) of confocal Z-stacks of MEFs transfected with Arl2 targeting siRNA (siRNA Arl2) or non-targeting siRNA control oligonucleotides (cRNA), ectopically expressing mCitrine-Rheb. Dot plots (right) depict the ratio of mean nuclear over total cell mCitrine-Rheb intensity (upper graphs) or the ratio of mean perinuclear over total cell mCitrine-Rheb intensity (lower graphs) for individual cells harboring control RNA (cRNA), siRNA Arl2, siRNA Arl3 and double knockdown (siRNA Arl2/3) ( $n > 16$  cells for each condition from 2 independent experiments). Data is represented as mean $\pm$ S.D.. P values were obtained by Student's t-test,  $>0.05$  are labeled as not significant (n.s.). Scale bars: 10 $\mu$ m.

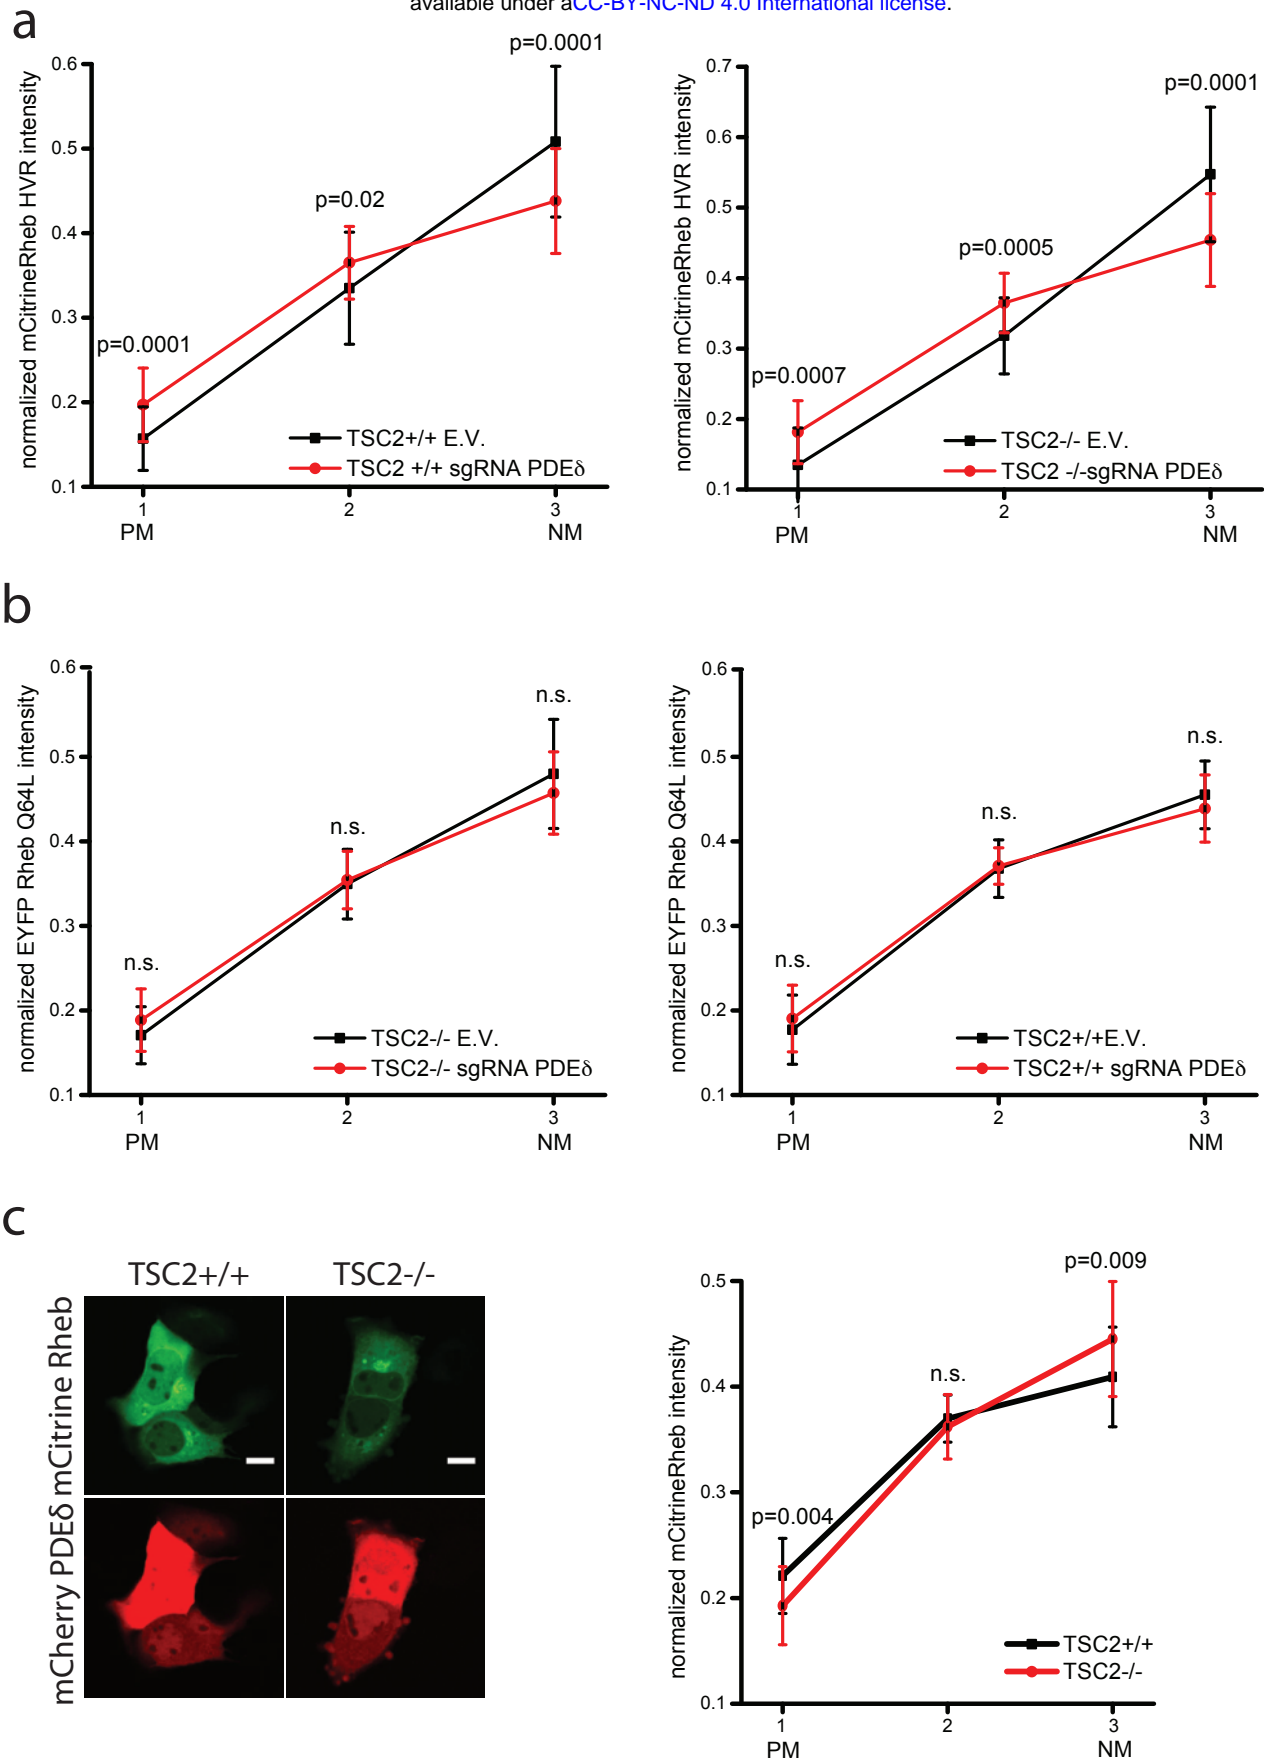

**Fig. 4:**

**GTP-loaded Rheb is retained on perinuclear membranes.** Localization of Rheb variants in TSC2<sup>+/+</sup> MEFs (left) and TSC2<sup>-/-</sup> MEFs (right) stably expressing either an empty Cas9 vector (E.V.) or a Cas9 vector encoding a single guide RNA for silencing PDE $\delta$  (sgRNA PDE $\delta$ ), transiently expressing either mCitrine-Rheb HVR (**a**) or the constitutively active EYFP-Rheb Q64L mutant (**b**). The steady state localization of the proteins was determined by segment analysis with angular masking. Radial profiles depict the normalized fluorescence intensity for each transiently expressed protein in each segment  $\pm$ S.D. for the indicated cell line ( $n > 15$  cells for each condition from two independent experiments). (**c**) Confocal micrographs of TSC2<sup>+/+</sup> MEFs (left column) and TSC2<sup>-/-</sup> MEFs (right column) co-expressing mCitrine-Rheb (upper row) and mCherry-PDE $\delta$  (lower row). Steady state localization of mCitrine-Rheb was quantified by segment analysis. Radial profiles as in **a,b** ( $n > 20$  cells for each condition from two independent experiments, TSC2<sup>+/+</sup>: black, TSC2<sup>-/-</sup>: red). P values were obtained by Student's t-test,  $>0.05$  are labeled as not significant (n.s.). Scale bars: 10  $\mu$ m.

# Figure 5.

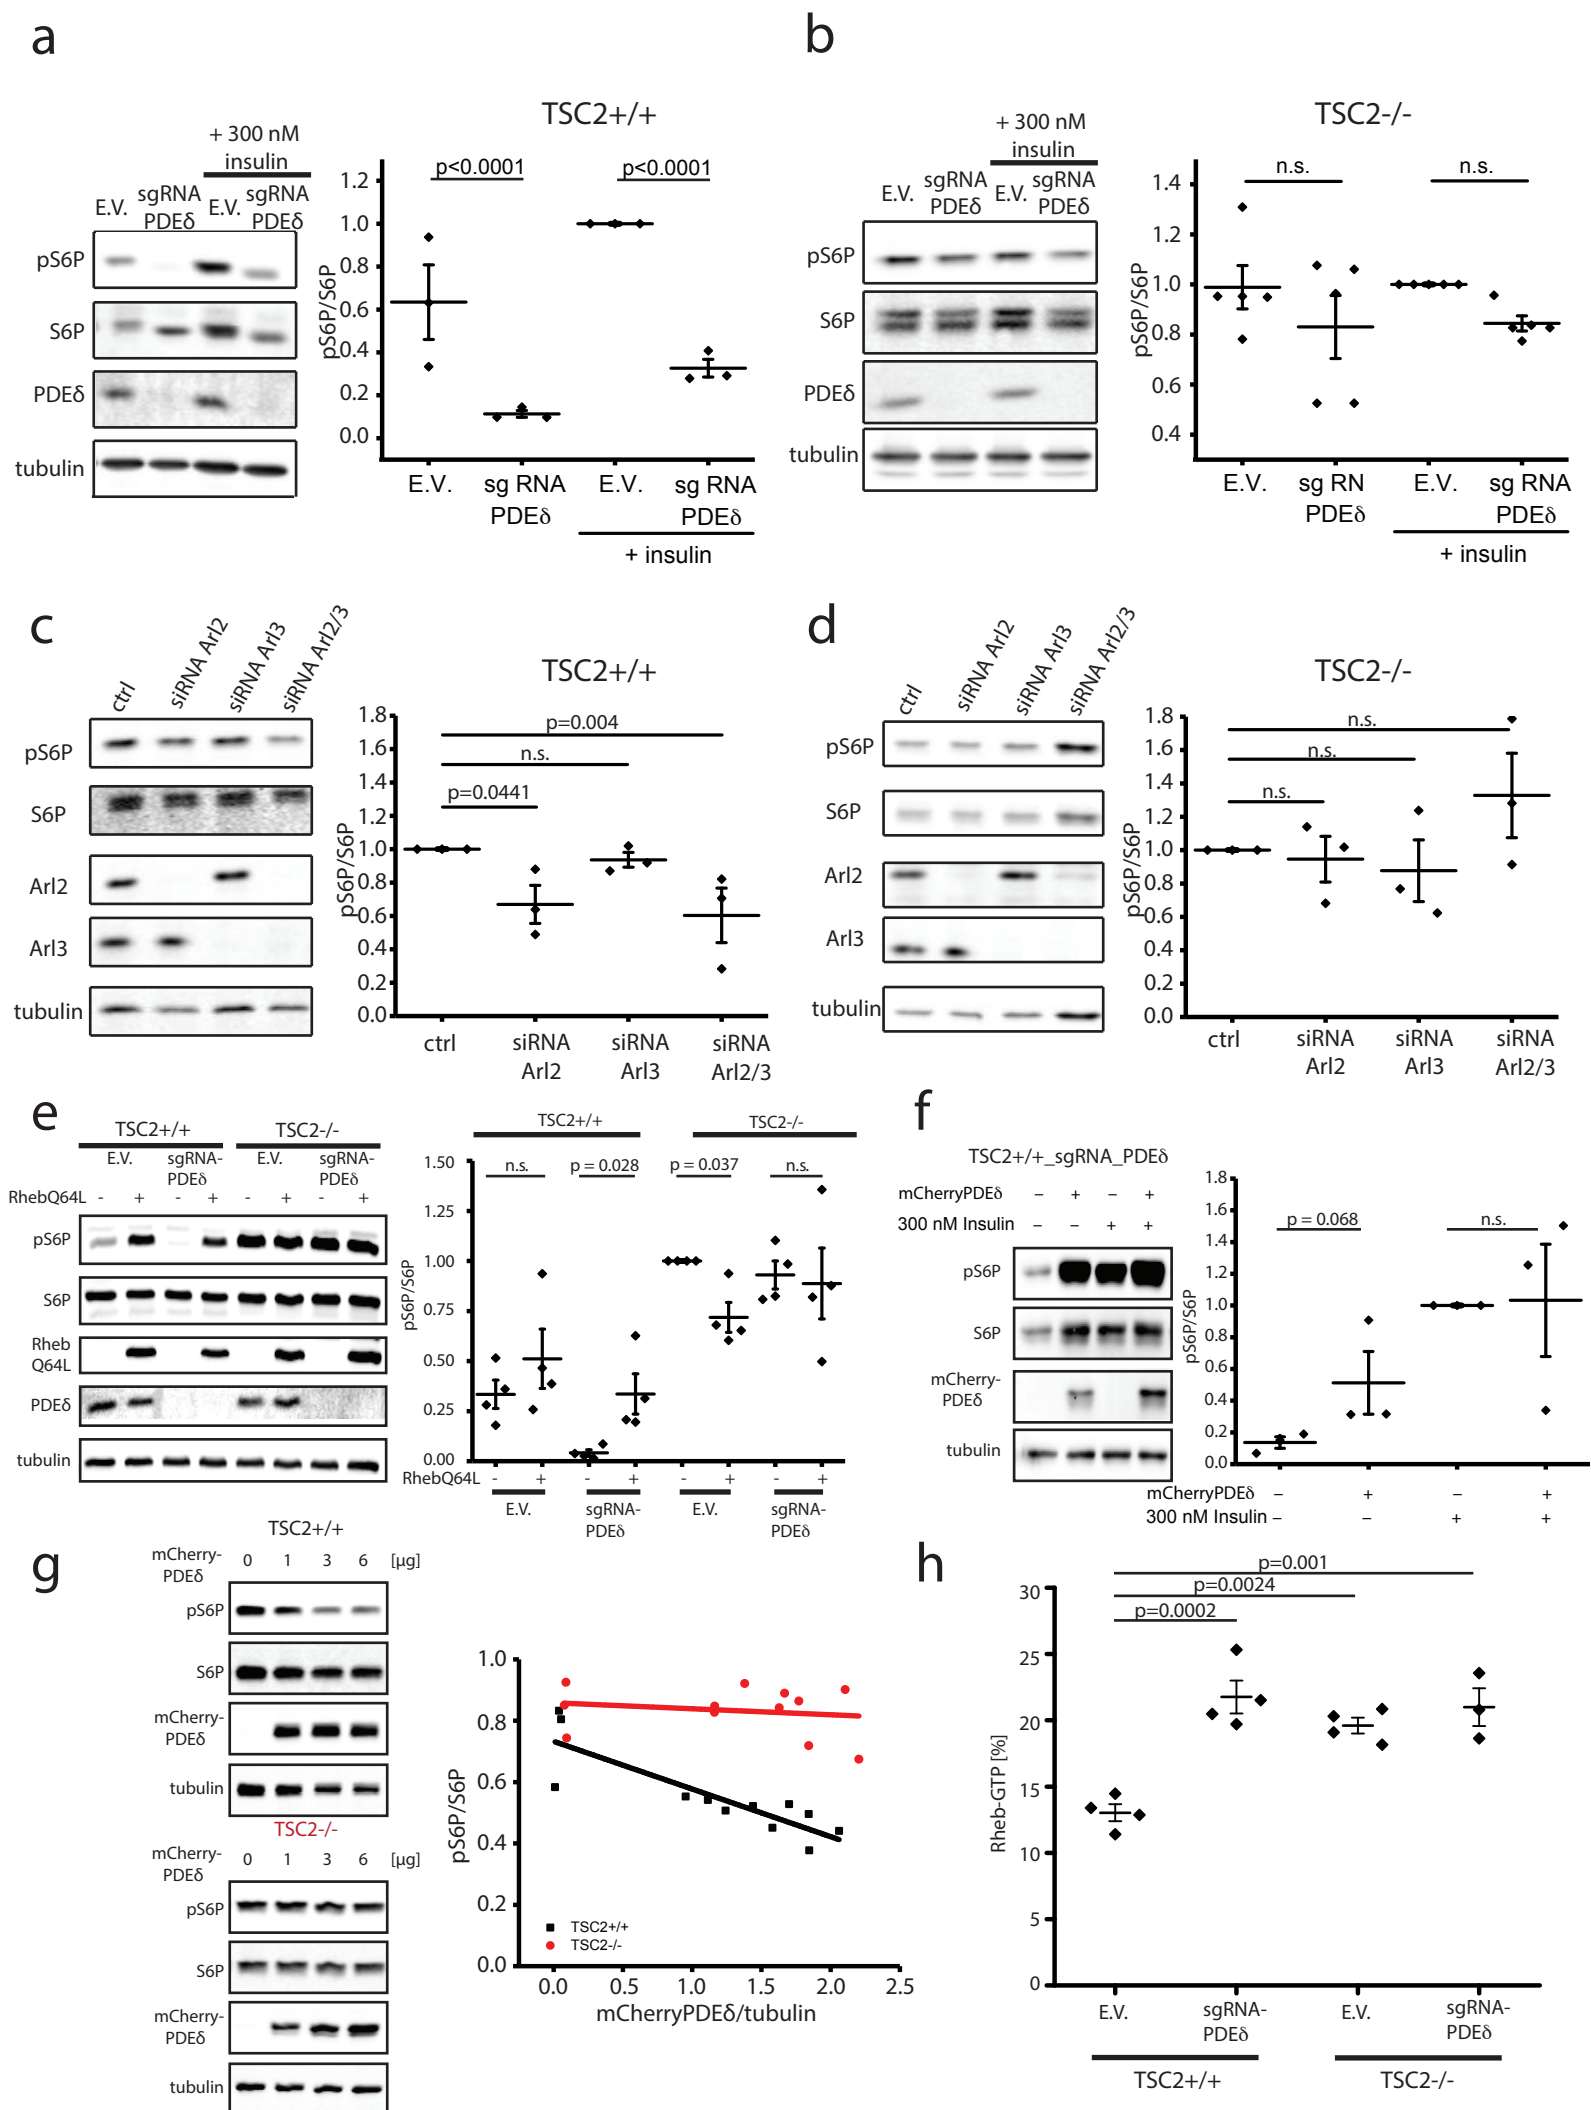

**Fig. 5:**

**The PDE $\delta$ /Arl2 system mediates Rheb-dependent mTORC1 signaling.** (a,b) S6P phosphorylation in serum-starved TSC2 $^{+/+}$  E.V. and TSC2 $^{+/+}$  sgRNA PDE $\delta$  MEF (a) and TSC2 $^{-/-}$  E.V. and TSC2 $^{-/-}$  sgRNA PDE $\delta$  MEF (b) prior and post insulin stimulation. Representative western blots (left) show phosphorylation of S6P (pS6P), total levels of S6P (S6P), PDE $\delta$  and tubulin (loading control). Dot plots (right) depict the level of pS6P/S6P normalized to the insulin-stimulated control cell line (E.V. + insulin) (TSC2 $^{+/+}$ : n=3; TSC2 $^{-/-}$ : N=5) for each individual blot. (c,d) S6P phosphorylation in TSC2 $^{+/+}$  (c) and TSC2 $^{-/-}$  MEFs (d) upon siRNA-mediated knockdown of Arl2, Arl3 or both determined by western blot 48h post siRNA transfection. Representative blots (left) show phosphorylation of S6P (pS6P), total levels of S6P (S6P), Arl2, Arl3 and tubulin (loading control). Dot plots (right) depict the level of pS6P/S6P normalized to control (non-targeting siRNA) (N=3) for each individual blot. P values >0.05 are labeled as not significant (n.s.). (e,f) S6P phosphorylation in serum-starved TSC2 $^{+/+}$  and TSC2 $^{-/-}$  MEFs with E.V. or sgRNA PDE $\delta$  and with/without transient mCitrine-RhebQ64L (e) or serum-starved TSC2 $^{+/+}$  sgRNA PDE $\delta$  with/without mCherry-PDE $\delta$  (f) expression. S6P phosphorylation levels in (f) were determined prior and post-insulin stimulation. Representative western blots (left) show phosphorylation of S6P (pS6P), total levels of S6P (S6P), mCitrineRhebQ64L or mCherryPDE $\delta$  expression and tubulin (loading control). Dot plots (right) depict the level of pS6P/S6P normalized to TSC2 $^{-/-}$  E.V. for each individual blot (e) or insulin-stimulated TSC2 $^{+/+}$  sgRNA PDE $\delta$  (f) (N=4 and 3, respectively). (g) Dependence of S6P phosphorylation on ectopic mCherry-PDE $\delta$  expression (24hrs post-transfection) in TSC2 $^{+/+}$  (black) and TSC2 $^{-/-}$  MEFs (red). Representative western blots (left) show phosphorylation of S6P (pS6P), total levels of S6P (S6P), mCherryPDE $\delta$  and tubulin (loading control). Scatter plot (right) shows the relative level of pS6P/S6P as function of mCherry-PDE $\delta$  expression normalized to the tubulin loading control. Lines represent linear fits to the data (N=3). P values were obtained by Student's t-test, >0.1 are labeled as not significant (n.s.) (h) Level of Rheb-GTP (GTP/(GTP+GDP)) in TSC2 $^{+/+}$  and TSC2 $^{-/-}$  MEFs with E.V. or sgRNA PDE $\delta$  determined by thin layer chromatography of radioactive GTP/GDP from immunoprecipitated endogenous Rheb (N= 4). P values were obtained by One-way



ANOVA using Turkey's multiple comparison. Insulin stimulation: 300nM for 15 minutes. Error bars depict S.E.M.

Figure 6.

a

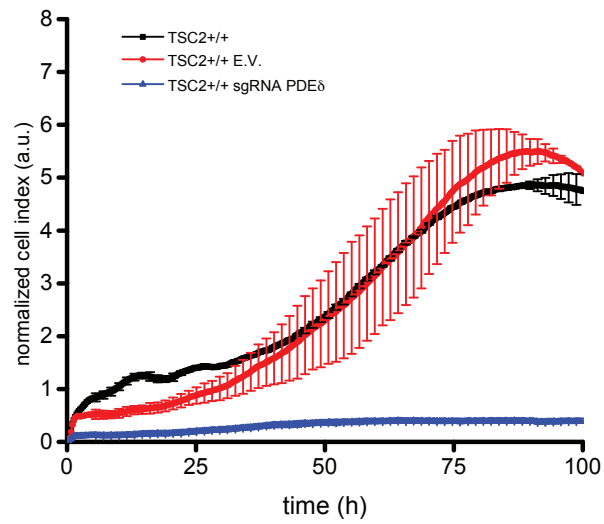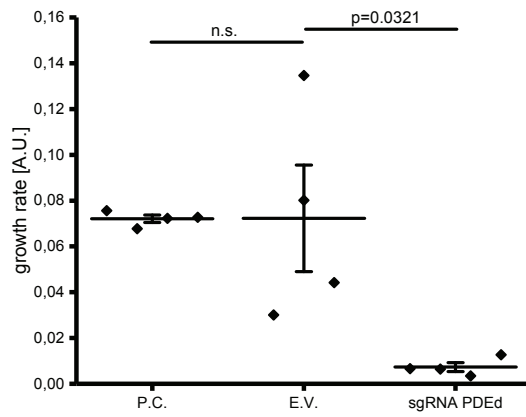

b

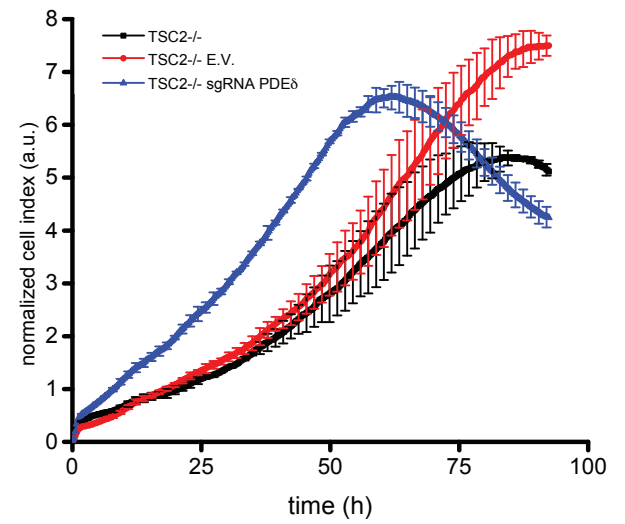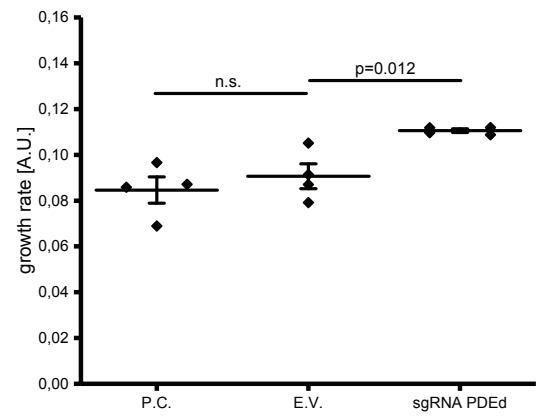

c

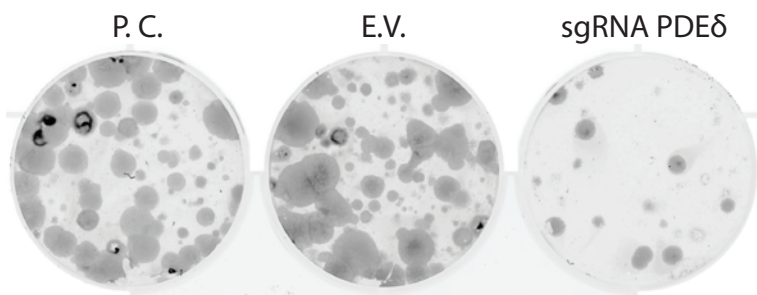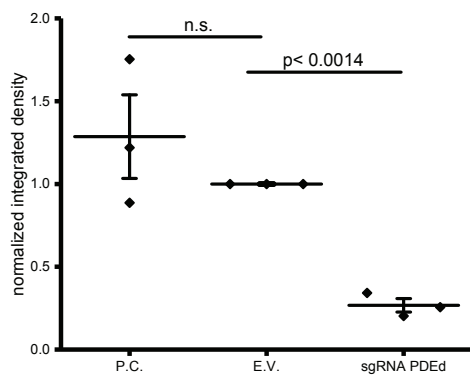

d

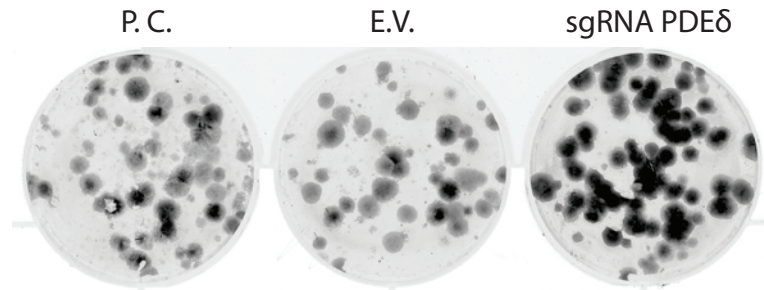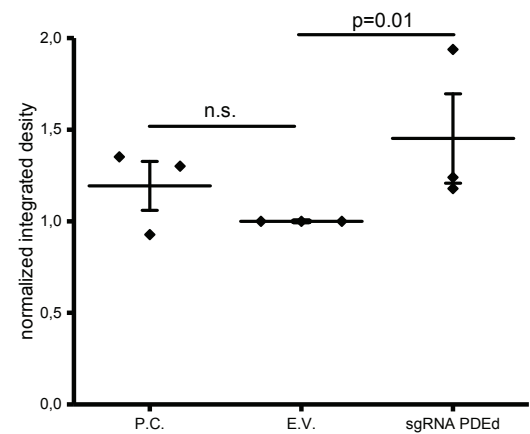

**Fig. 6.**

**Cell growth depends on PDE $\delta$  in MEFs with regulated TSC2 activity. (a,b)**

Representative RTCA growth profiles for TSC2+/+ (a) and TSC2-/- MEF (b) parental cell lines (black trace) or stably expressing either an empty Cas9 vector (E.V; red trace) or a Cas9 vector encoding a single guide RNA for silencing PDE $\delta$  (sgRNA PDE $\delta$ ; blue trace). Dot plots underneath depict the average growth rate  $\pm$  S.E.M. between 40 and 60 hours (N=4 independent experiments in duplicate for all cell lines). (c,d) Clonogenic assays of TSC2+/+ MEF (c) and TSC2-/- MEF (d) parental cell lines (P.C.) or stably expressing either an empty Ca9 vector (E.V) or a Cas9 vector encoding a single guide RNA for silencing PDE $\delta$  (sgRNA PDE $\delta$ ). Dot plots underneath depict the mean colony area coverage normalised to the E.V. control well (N=3 independent experiments, data are mean $\pm$ S.E.M.). P values were obtained by Student's t-test, >0.05 are labeled as not significant (n.s.).

# Figure 7.

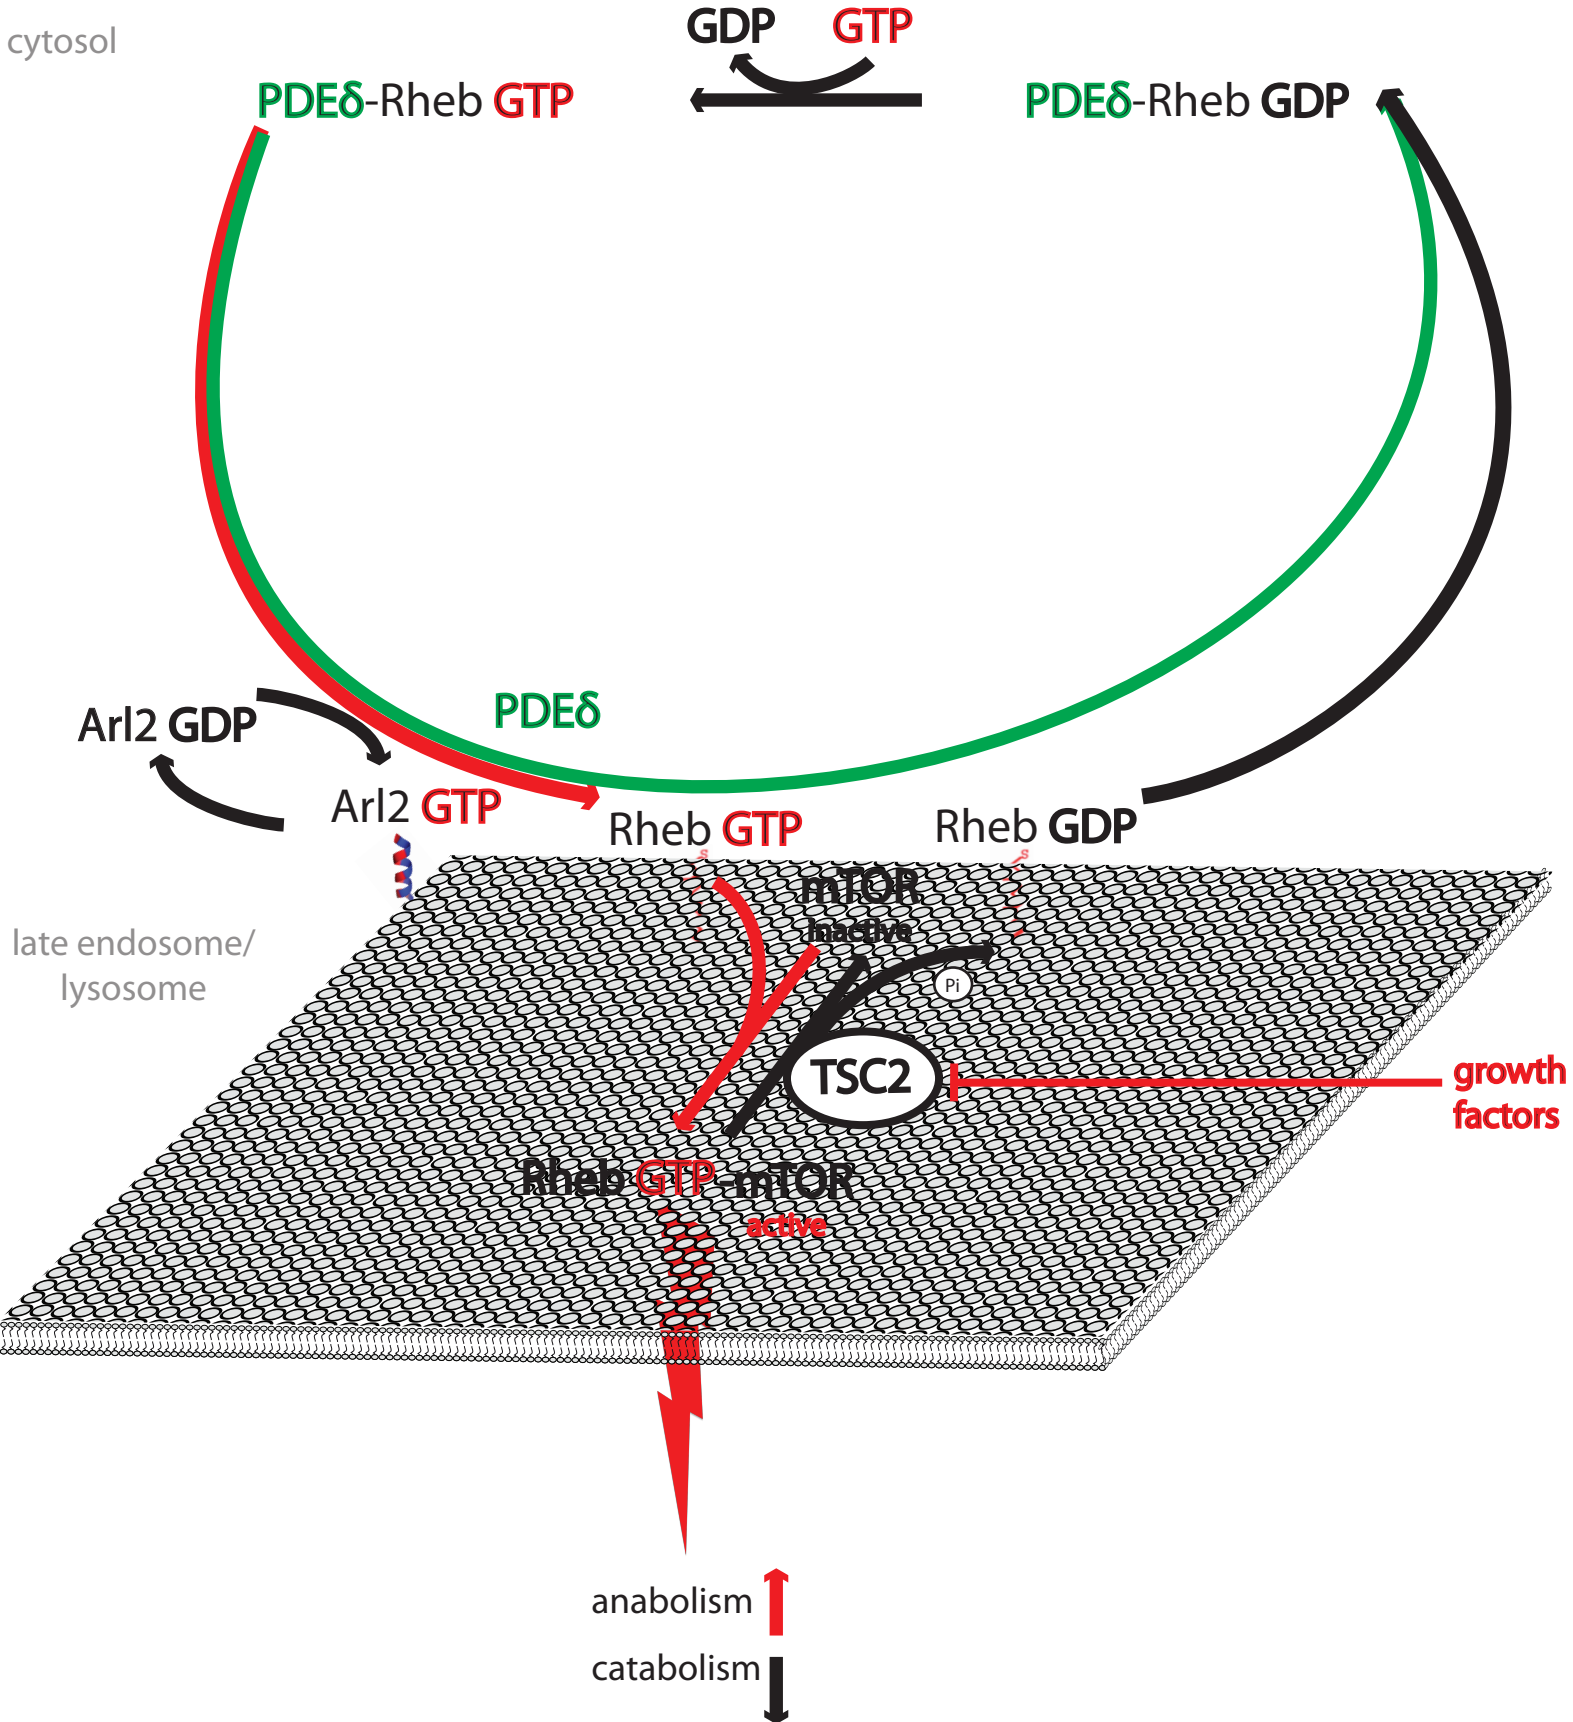

**Fig. 7.**

**The spatially regulated GTPase cycle of Rheb.** Rheb-GDP dissociating from perinuclear membranes is sequestered by PDE $\delta$  (green) in the cytosol, where efficient exchange of GDP (black) to GTP (red) occurs. The PDE $\delta$ /Rheb-GTP complex dissociates by localized Arl2-GTP activity to unload Rheb-GTP onto perinuclear membranes. On the lysosomal surface, Rheb-GTP stably binds to and activates the effector mTOR, resulting in promotion of anabolic and inhibition of catabolic processes. In the absence of growth factors, the Rheb-GAP TSC2 hydrolyzes Rheb-GTP to Rheb-GDP, which is then released from mTOR and readily dissociates from membranes to be re-sequestered by PDE $\delta$  in the cytosol.
